# Supplementary material for: Application of novel metal–organic framework [Zr-UiO-66-PDC-SO3H]FeCl4 in the synthesis of dihydrobenzo[g]pyrimido[4,5-b]quinoline derivatives
Source: Royal Society of Chemistry journal article supplement (doi:10.1039/d1ra08710j), 2022-01-01
Supplement: d1ra08710j1.pdf [file d1ra08710j1.pdf]

## Supporting information

### **Application of novel metal-organic frameworks [Zr-Uio-66-PDC-SO<sub>3</sub>H]FeCl<sub>4</sub> in synthesis of dihydrobenzo[*g*]pyrimido[4,5-*b*]quinoline derivatives**

Fatemeh Jalili, Mahmoud Zarei,\* Mohammad Ali Zolfigol, \* Ardeshir Khazaei\*

Department of Organic Chemistry, Faculty of Chemistry, Bu-Ali-Sina University, 6517838965, Hamedan, Iran., E-mail: Mahmoud8103@yahoo.com (M. Zarei), zolfi@basu.ac.ir, mzolfigol@yahoo.com (M. A. Zolfigol) or Khazaei\_1326@yahoo.com (A. Khazaei).

# Content

## Table of Contents

|                                                                                                                                                       |           |
|-------------------------------------------------------------------------------------------------------------------------------------------------------|-----------|
| <i>FT-IR spectrum of 1,3-dimethyl-5-(p-tolyl)-5,12-dihydrobenzo[g]pyrimido[4,5-b]quinoline-2,4,6,11(1H,3H)-tetraone (U1).....</i>                     | <i>3</i>  |
| <i><sup>1</sup>H NMR spectrum of 1,3-dimethyl-5-(p-tolyl)-5,12-dihydrobenzo[g]pyrimido[4,5-b]quinoline-2,4,6,11(1H,3H)-tetraone (U1).....</i>         | <i>4</i>  |
| <i><sup>13</sup>C NMR spectrum of 1,3-dimethyl-5-(p-tolyl)-5,12-dihydrobenzo[g]pyrimido[4,5-b]quinoline-2,4,6,11(1H,3H)-tetraone (U1).....</i>        | <i>5</i>  |
| <i>Mass spectrum of 1,3-dimethyl-5-(p-tolyl)-5,12-dihydrobenzo[g]pyrimido[4,5-b]quinoline-2,4,6,11(1H,3H)-tetraone (U1).....</i>                      | <i>6</i>  |
| <i>FT-IR spectrum of 1,3-dimethyl-5-(4-nitrophenyl)-5,12-dihydrobenzo[g]pyrimido[4,5-b]quinoline-2,4,6,11(1H,3H)-tetraone (U2).....</i>               | <i>7</i>  |
| <i><sup>1</sup>H NMR spectrum of 1,3-dimethyl-5-(4-nitrophenyl)-5,12-dihydrobenzo[g]pyrimido[4,5-b]quinoline-2,4,6,11(1H,3H)-tetraone (U2).....</i>   | <i>8</i>  |
| <i><sup>13</sup>C NMR spectrum of 1,3-dimethyl-5-(4-nitrophenyl)-5,12-dihydrobenzo[g]pyrimido[4,5-b]quinoline-2,4,6,11(1H,3H)-tetraone (U2).....</i>  | <i>9</i>  |
| <i>Mass spectrum of 1,3-dimethyl-5-(4-nitrophenyl)-5,12-dihydrobenzo[g]pyrimido[4,5-b]quinoline-2,4,6,11(1H,3H)-tetraone (U2).....</i>                | <i>10</i> |
| <i>FT-IR spectrum of 5-(4-chlorophenyl)-1,3-dimethyl-5,12-dihydrobenzo[g]pyrimido[4,5-b]quinoline-2,4,6,11(1H,3H)-tetraone (U3).....</i>              | <i>11</i> |
| <i><sup>1</sup>H NMR spectrum of 5-(4-chlorophenyl)-1,3-dimethyl-5,12-dihydrobenzo[g]pyrimido[4,5-b]quinoline-2,4,6,11(1H,3H)-tetraone (U3).....</i>  | <i>12</i> |
| <i><sup>13</sup>C NMR spectrum of 5-(4-chlorophenyl)-1,3-dimethyl-5,12-dihydrobenzo[g]pyrimido[4,5-b]quinoline-2,4,6,11(1H,3H)-tetraone (U3).....</i> | <i>13</i> |
| <i>Mass spectrum of 5-(4-chlorophenyl)-1,3-dimethyl-5,12-dihydrobenzo[g]pyrimido[4,5-b]quinoline-2,4,6,11(1H,3H)-tetraone (U3).....</i>               | <i>14</i> |

|                 |          |          |                                                                                                                            |                                                                                                                            |    |
|-----------------|----------|----------|----------------------------------------------------------------------------------------------------------------------------|----------------------------------------------------------------------------------------------------------------------------|----|
| FT-IR           | spectrum | of       | 5-(3,4-difluorophenyl)-1,3-dimethyl-5,12-dihydrobenzo[g]pyrimido[4,5-b]quinoline-2,4,6,11(1H,3H)-tetraone (U4).....        | 15                                                                                                                         |    |
| <sup>1</sup> H  | NMR      | spectrum | of                                                                                                                         | 5-(3,4-difluorophenyl)-1,3-dimethyl-5,12-dihydrobenzo[g]pyrimido[4,5-b]quinoline-2,4,6,11(1H,3H)-tetraone (U4).....        | 16 |
| <sup>13</sup> C | NMR      | spectrum | of                                                                                                                         | 5-(3,4-difluorophenyl)-1,3-dimethyl-5,12-dihydrobenzo[g]pyrimido[4,5-b]quinoline-2,4,6,11(1H,3H)-tetraone (U4).....        | 17 |
| Mass            | spectrum | of       | 5-(3,4-difluorophenyl)-1,3-dimethyl-5,12-dihydrobenzo[g]pyrimido[4,5-b]quinoline-2,4,6,11(1H,3H)-tetraone (U4).....        | 18                                                                                                                         |    |
| FT-IR           | spectrum | of       | 1,3-dimethyl-5-(4-(trifluoromethyl)phenyl)-5,12-dihydrobenzo[g]pyrimido[4,5-b]quinoline-2,4,6,11(1H,3H)-tetraone (U5)..... | 19                                                                                                                         |    |
| <sup>1</sup> H  | NMR      | spectrum | of                                                                                                                         | 1,3-dimethyl-5-(4-(trifluoromethyl)phenyl)-5,12-dihydrobenzo[g]pyrimido[4,5-b]quinoline-2,4,6,11(1H,3H)-tetraone (U5)..... | 20 |
| <sup>13</sup> C | NMR      | spectrum | of                                                                                                                         | 1,3-dimethyl-5-(4-(trifluoromethyl)phenyl)-5,12-dihydrobenzo[g]pyrimido[4,5-b]quinoline-2,4,6,11(1H,3H)-tetraone (U5)..... | 21 |
| Mass            | spectrum | of       | 1,3-dimethyl-5-(4-(trifluoromethyl)phenyl)-5,12-dihydrobenzo[g]pyrimido[4,5-b]quinoline-2,4,6,11(1H,3H)-tetraone (U5)..... | 22                                                                                                                         |    |
| FT-IR           | spectrum | of       | 5-(3,5-difluorophenyl)-1,3-dimethyl-5,12-dihydrobenzo[g]pyrimido[4,5-b]quinoline-2,4,6,11(1H,3H)-tetraone (U6).....        | 23                                                                                                                         |    |
| <sup>1</sup> H  | NMR      | spectrum | of                                                                                                                         | 5-(3,5-difluorophenyl)-1,3-dimethyl-5,12-dihydrobenzo[g]pyrimido[4,5-b]quinoline-2,4,6,11(1H,3H)-tetraone (U6).....        | 24 |
| <sup>13</sup> C | NMR      | spectrum | of                                                                                                                         | 5-(3,5-difluorophenyl)-1,3-dimethyl-5,12-dihydrobenzo[g]pyrimido[4,5-b]quinoline-2,4,6,11(1H,3H)-tetraone (U6).....        | 25 |
| Mass            | spectrum | of       | 5-(3,5-difluorophenyl)-1,3-dimethyl-5,12-dihydrobenzo[g]pyrimido[4,5-b]quinoline-2,4,6,11(1H,3H)-tetraone (U6).....        | 26                                                                                                                         |    |
| FT-IR           | spectrum | of       | 5-(3-hydroxyphenyl)-1,3-dimethyl-5,12-dihydrobenzo[g]pyrimido[4,5-b]quinoline-2,4,6,11(1H,3H)-tetraone (U7).....           | 27                                                                                                                         |    |

|                 |          |          |                                                                                                                      |                                                                                                                      |    |
|-----------------|----------|----------|----------------------------------------------------------------------------------------------------------------------|----------------------------------------------------------------------------------------------------------------------|----|
| <sup>1</sup> H  | NMR      | spectrum | of                                                                                                                   | 5-(3-hydroxyphenyl)-1,3-dimethyl-5,12-dihydrobenzo[g]pyrimido[4,5-b]quinoline-2,4,6,11(1H,3H)-tetraone (U7).....     | 28 |
| <sup>13</sup> C | NMR      | spectrum | of                                                                                                                   | 5-(3-hydroxyphenyl)-1,3-dimethyl-5,12-dihydrobenzo[g]pyrimido[4,5-b]quinoline-2,4,6,11(1H,3H)-tetraone (U7).....     | 29 |
| Mass            | spectrum | of       | 5-(3-hydroxyphenyl)-1,3-dimethyl-5,12-dihydrobenzo[g]pyrimido[4,5-b]quinoline-2,4,6,11(1H,3H)-tetraone (U7).....     | 30                                                                                                                   |    |
| FT-IR           | spectrum | of       | 1,3-dimethyl-5-phenyl-5,12-dihydrobenzo[g]pyrimido[4,5-b]quinoline-2,4,6,11(1H,3H)-tetraone (U8).....                | 31                                                                                                                   |    |
| <sup>1</sup> H  | NMR      | spectrum | of                                                                                                                   | 1,3-dimethyl-5-phenyl-5,12-dihydrobenzo[g]pyrimido[4,5-b]quinoline-2,4,6,11(1H,3H)-tetraone (U8).....                | 32 |
| <sup>13</sup> C | NMR      | spectrum | of                                                                                                                   | 1,3-dimethyl-5-phenyl-5,12-dihydrobenzo[g]pyrimido[4,5-b]quinoline-2,4,6,11(1H,3H)-tetraone (U8).....                | 33 |
| Mass            | spectrum | of       | 1,3-dimethyl-5-phenyl-5,12-dihydrobenzo[g]pyrimido[4,5-b]quinoline-2,4,6,11(1H,3H)-tetraone (U8).....                | 34                                                                                                                   |    |
| <sup>1</sup> H  | NMR      | spectrum | of                                                                                                                   | 5-(2-methoxyphenyl)-1,3-dimethyl-5,12-dihydrobenzo[g]pyrimido[4,5-b]quinoline-2,4,6,11(1H,3H)-tetraone (U9).....     | 36 |
| <sup>13</sup> C | NMR      | spectrum | of                                                                                                                   | 5-(2-methoxyphenyl)-1,3-dimethyl-5,12-dihydrobenzo[g]pyrimido[4,5-b]quinoline-2,4,6,11(1H,3H)-tetraone (U9).....     | 37 |
| Mass            | spectrum | of       | 5-(2-methoxyphenyl)-1,3-dimethyl-5,12-dihydrobenzo[g]pyrimido[4,5-b]quinoline-2,4,6,11(1H,3H)-tetraone (U9).....     | 38                                                                                                                   |    |
| FT-IR           | spectrum | of       | 5-(2,4-dichlorophenyl)-1,3-dimethyl-5,12-dihydrobenzo[g]pyrimido[4,5-b]quinoline-2,4,6,11(1H,3H)-tetraone (U10)..... | 39                                                                                                                   |    |
| <sup>1</sup> H  | NMR      | spectrum | of                                                                                                                   | 5-(2,4-dichlorophenyl)-1,3-dimethyl-5,12-dihydrobenzo[g]pyrimido[4,5-b]quinoline-2,4,6,11(1H,3H)-tetraone (U10)..... | 40 |
| <sup>13</sup> C | NMR      | spectrum | of                                                                                                                   | 5-(2,4-dichlorophenyl)-1,3-dimethyl-5,12-dihydrobenzo[g]pyrimido[4,5-b]quinoline-2,4,6,11(1H,3H)-tetraone (U10)..... | 41 |

|                                                                                                                                                          |    |
|----------------------------------------------------------------------------------------------------------------------------------------------------------|----|
| Mass spectrum of 5-(2,4-dichlorophenyl)-1,3-dimethyl-5,12-dihydrobenzo[g]pyrimido[4,5-b]quinoline-2,4,6,11(1H,3H)-tetraone (U10).....                    | 42 |
| FT-IR spectrum of 5-(4-methoxyphenyl)-1,3-dimethyl-5,12-dihydrobenzo[g]pyrimido[4,5-b]quinoline-2,4,6,11(1H,3H)-tetraone (U11).....                      | 43 |
| <sup>1</sup> H NMR spectrum of 5-(4-methoxyphenyl)-1,3-dimethyl-5,12-dihydrobenzo[g]pyrimido[4,5-b]quinoline-2,4,6,11(1H,3H)-tetraone (U11).....         | 44 |
| <sup>13</sup> C NMR spectrum of 5-(4-methoxyphenyl)-1,3-dimethyl-5,12-dihydrobenzo[g]pyrimido[4,5-b]quinoline-2,4,6,11(1H,3H)-tetraone (U11).....        | 45 |
| Mass spectrum of 5-(4-methoxyphenyl)-1,3-dimethyl-5,12-dihydrobenzo[g]pyrimido[4,5-b]quinoline-2,4,6,11(1H,3H)-tetraone (U11).....                       | 46 |
| FT-IR spectrum of 5-(4-(dimethylamino)phenyl)-1,3-dimethyl-5,12-dihydrobenzo[g]pyrimido[4,5-b]quinoline-2,4,6,11(1H,3H)-tetraone (U12).....              | 47 |
| <sup>1</sup> H NMR spectrum of 5-(4-(dimethylamino)phenyl)-1,3-dimethyl-5,12-dihydrobenzo[g]pyrimido[4,5-b]quinoline-2,4,6,11(1H,3H)-tetraone (U12)..... | 48 |
| <sup>1</sup> H NMR spectrum of 5-(4-(dimethylamino)phenyl)-1,3-dimethyl-5,12-dihydrobenzo[g]pyrimido[4,5-b]quinoline-2,4,6,11(1H,3H)-tetraone (U12)..... | 49 |
| Mass spectrum of 5-(4-(dimethylamino)phenyl)-1,3-dimethyl-5,12-dihydrobenzo[g]pyrimido[4,5-b]quinoline-2,4,6,11(1H,3H)-tetraone (U12).....               | 50 |
| FT-IR spectrum of 5-(4-isopropylphenyl)-1,3-dimethyl-5,12-dihydrobenzo[g]pyrimido[4,5-b]quinoline-2,4,6,11(1H,3H)-tetraone (U13).....                    | 51 |
| <sup>1</sup> H NMR spectrum of 5-(4-isopropylphenyl)-1,3-dimethyl-5,12-dihydrobenzo[g]pyrimido[4,5-b]quinoline-2,4,6,11(1H,3H)-tetraone (U13).....       | 52 |
| <sup>13</sup> C NMR spectrum of 5-(4-isopropylphenyl)-1,3-dimethyl-5,12-dihydrobenzo[g]pyrimido[4,5-b]quinoline-2,4,6,11(1H,3H)-tetraone (U13).....      | 53 |
| Mass spectrum of 5-(4-isopropylphenyl)-1,3-dimethyl-5,12-dihydrobenzo[g]pyrimido[4,5-b]quinoline-2,4,6,11(1H,3H)-tetraone (U13).....                     | 54 |

|                 |          |          |                                                                                                                         |                                                                                                                         |    |
|-----------------|----------|----------|-------------------------------------------------------------------------------------------------------------------------|-------------------------------------------------------------------------------------------------------------------------|----|
| FT-IR           | spectrum | of       | 5-(4-hydroxyphenyl)-1,3-dimethyl-5,12-dihydrobenzo[g]pyrimido[4,5-b]quinoline-2,4,6,11(1H,3H)-tetraone (U14).....       | 55                                                                                                                      |    |
| <sup>1</sup> H  | NMR      | spectrum | of                                                                                                                      | 5-(4-hydroxyphenyl)-1,3-dimethyl-5,12-dihydrobenzo[g]pyrimido[4,5-b]quinoline-2,4,6,11(1H,3H)-tetraone (U14).....       | 56 |
| <sup>13</sup> C | NMR      | spectrum | of                                                                                                                      | 5-(4-hydroxyphenyl)-1,3-dimethyl-5,12-dihydrobenzo[g]pyrimido[4,5-b]quinoline-2,4,6,11(1H,3H)-tetraone (U14).....       | 57 |
| Mass            | spectrum | of       | 5-(4-hydroxyphenyl)-1,3-dimethyl-5,12-dihydrobenzo[g]pyrimido[4,5-b]quinoline-2,4,6,11(1H,3H)-tetraone (U14).....       | 58                                                                                                                      |    |
| FT-IR           | spectrum | of       | 1,3-dimethyl-5-(3-nitrophenyl)-5,12-dihydrobenzo[g]pyrimido[4,5-b]quinoline-2,4,6,11(1H,3H)-tetraone (U15).....         | 59                                                                                                                      |    |
| <sup>1</sup> H  | NMR      | spectrum | of                                                                                                                      | 1,3-dimethyl-5-(3-nitrophenyl)-5,12-dihydrobenzo[g]pyrimido[4,5-b]quinoline-2,4,6,11(1H,3H)-tetraone (U15).....         | 60 |
| <sup>13</sup> C | NMR      | spectrum | of                                                                                                                      | 1,3-dimethyl-5-(3-nitrophenyl)-5,12-dihydrobenzo[g]pyrimido[4,5-b]quinoline-2,4,6,11(1H,3H)-tetraone (U15).....         | 61 |
| Mass            | spectrum | of       | 1,3-dimethyl-5-(3-nitrophenyl)-5,12-dihydrobenzo[g]pyrimido[4,5-b]quinoline-2,4,6,11(1H,3H)-tetraone (U15).....         | 62                                                                                                                      |    |
| FT-IR           | spectrum | of       | 5,5'-(1,3-phenylene)bis(1,3-dimethyl-5,12-dihydrobenzo[g]pyrimido[4,5-b]quinoline-2,4,6,11(1H,3H)-tetraone) (U16). .... | 63                                                                                                                      |    |
| <sup>1</sup> H  | NMR      | spectrum | of                                                                                                                      | 5,5'-(1,3-phenylene)bis(1,3-dimethyl-5,12-dihydrobenzo[g]pyrimido[4,5-b]quinoline-2,4,6,11(1H,3H)-tetraone) (U16). .... | 64 |
| <sup>13</sup> C | NMR      | spectrum | of                                                                                                                      | 5,5'-(1,3-phenylene)bis(1,3-dimethyl-5,12-dihydrobenzo[g]pyrimido[4,5-b]quinoline-2,4,6,11(1H,3H)-tetraone) (U16). .... | 65 |
| Mass            | spectrum | of       | 5,5'-(1,3-phenylene)bis(1,3-dimethyl-5,12-dihydrobenzo[g]pyrimido[4,5-b]quinoline-2,4,6,11(1H,3H)-tetraone) (U16). .... | 66                                                                                                                      |    |
| FT-IR           | spectrum | of       | 5,5'-(1,4-phenylene)bis(1,3-dimethyl-5,12-dihydrobenzo[g]pyrimido[4,5-b]quinoline-2,4,6,11(1H,3H)-tetraone) (U17). .... | 67                                                                                                                      |    |

|                                                                                                                                                         |           |
|---------------------------------------------------------------------------------------------------------------------------------------------------------|-----------|
| <i><sup>1</sup>H NMR spectrum of 5,5'-(1,4-phenylene)bis(1,3-dimethyl-5,12-dihydrobenzo[g]pyrimido[4,5-b]quinoline-2,4,6,11(1H,3H)-tetraone) (U17).</i> | <i>68</i> |
| <i>NMR spectrum of 5,5'-(1,4-phenylene)bis(1,3-dimethyl-5,12-dihydrobenzo[g]pyrimido[4,5-b]quinoline-2,4,6,11(1H,3H)-tetraone) (U17).</i>               | <i>69</i> |
| <i>Mass spectrum of 5,5'-(1,4-phenylene)bis(1,3-dimethyl-5,12-dihydrobenzo[g]pyrimido[4,5-b]quinoline-2,4,6,11(1H,3H)-tetraone) (U17).</i>              | <i>70</i> |

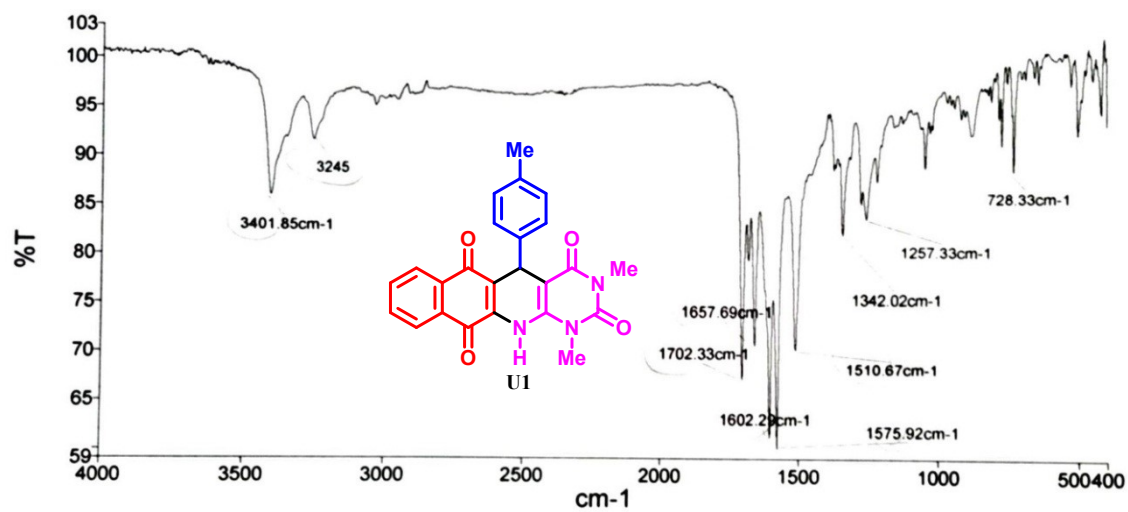

FT-IR spectrum of 1,3-dimethyl-5-(p-tolyl)-5,12-dihydrobenzo[g]pyrimido[4,5-b]quinoline-2,4,6,11(1H,3H)-tetraone (U1).



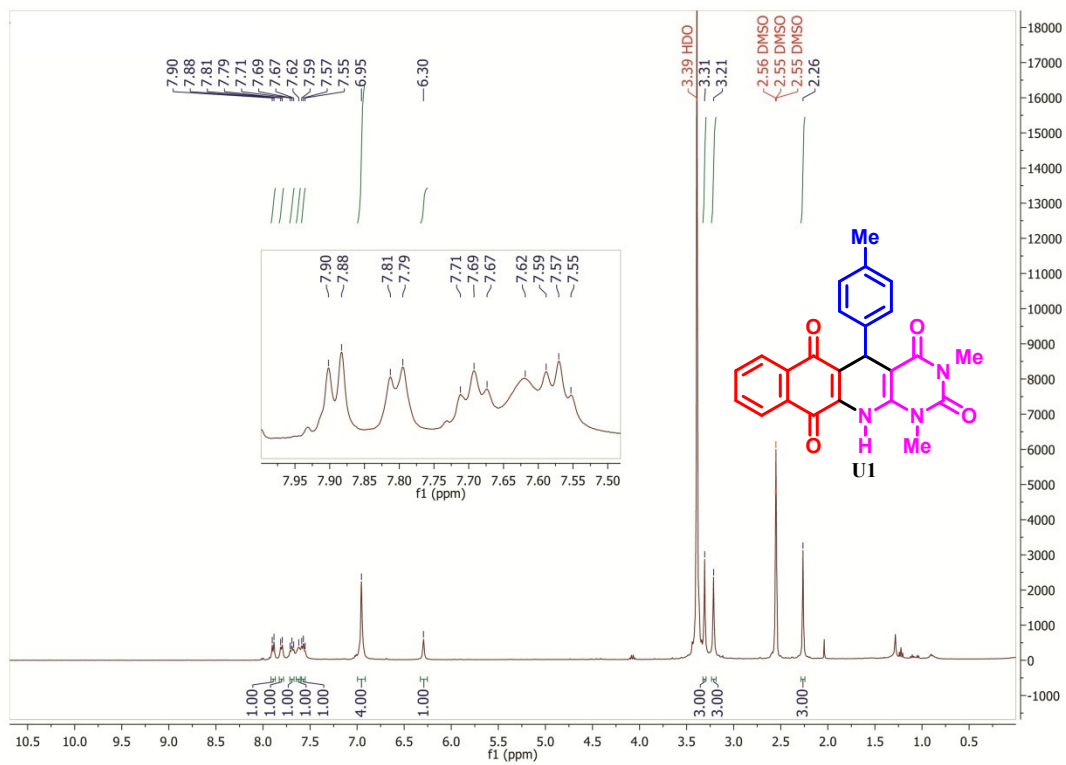

**<sup>1</sup>H NMR spectrum of 1,3-dimethyl-5-(*p*-tolyl)-5,12-dihydrobenzo[*g*]pyrimido[4,5-*b*]quinoline-2,4,6,11(1*H*,3*H*)-tetraone (U1).**

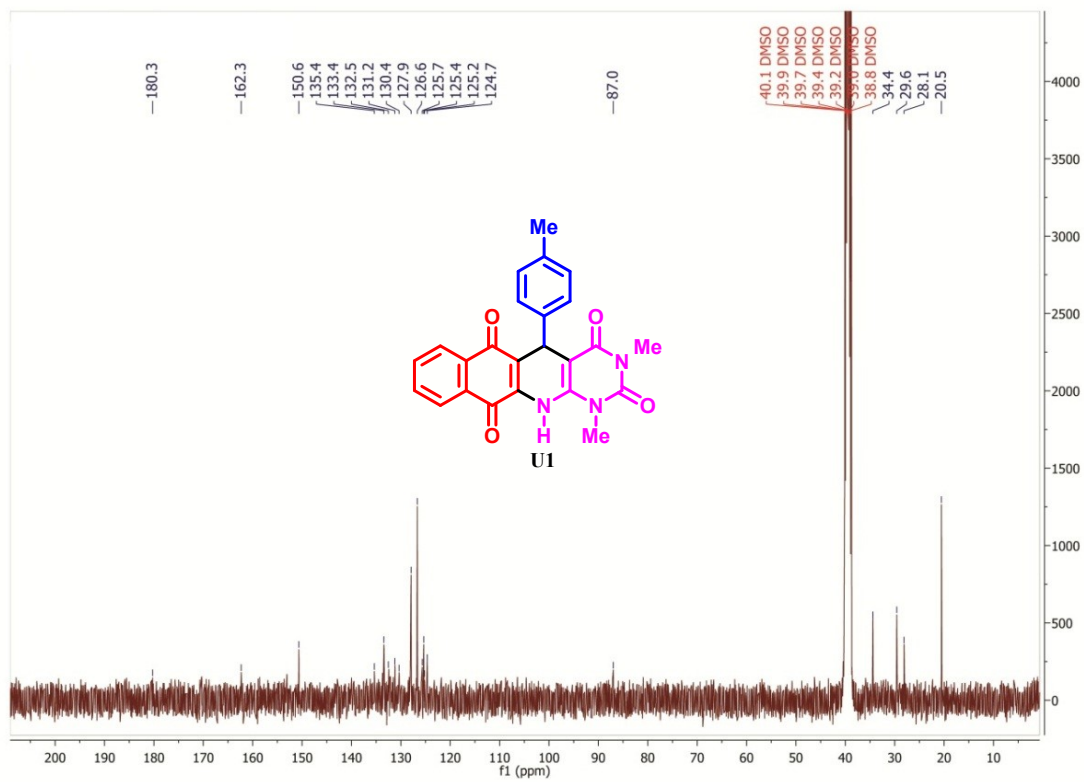

<sup>13</sup>C NMR spectrum of 1,3-dimethyl-5-(*p*-tolyl)-5,12-dihydrobenzo[*g*]pyrimido[4,5-*b*]quinoline-2,4,6,11(1*H*,3*H*)-tetraone (U1).

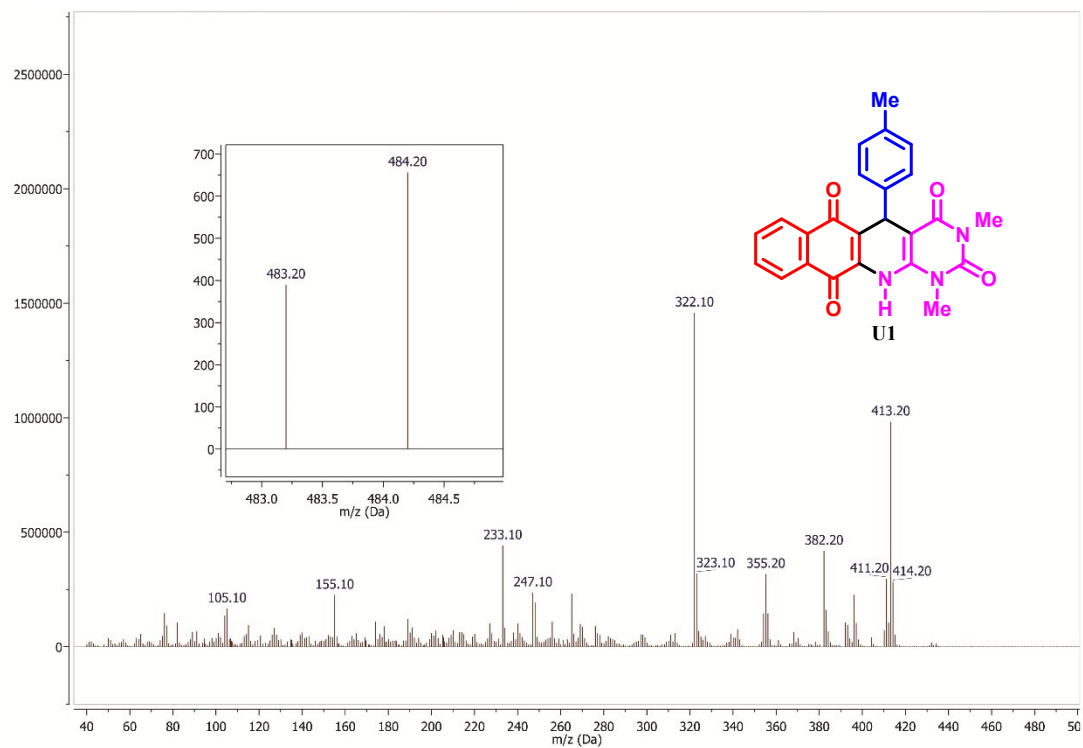

**Mass spectrum of 1,3-dimethyl-5-(*p*-tolyl)-5,12-dihydrobenzo[*g*]pyrimido[4,5-*b*]quinoline-2,4,6,11(1*H*,3*H*)-tetraone (U1).**

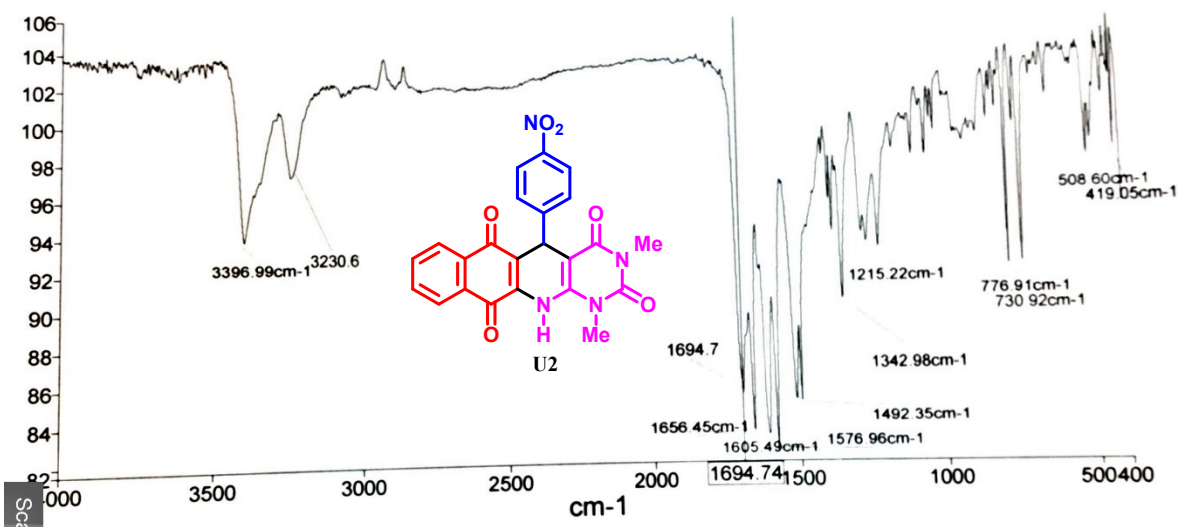

FT-IR spectrum of 1,3-dimethyl-5-(4-nitrophenyl)-5,12-dihydrobenzo[*g*]pyrimido[4,5-*b*]quinoline-2,4,6,11(1*H*,3*H*)-tetraone (U2).

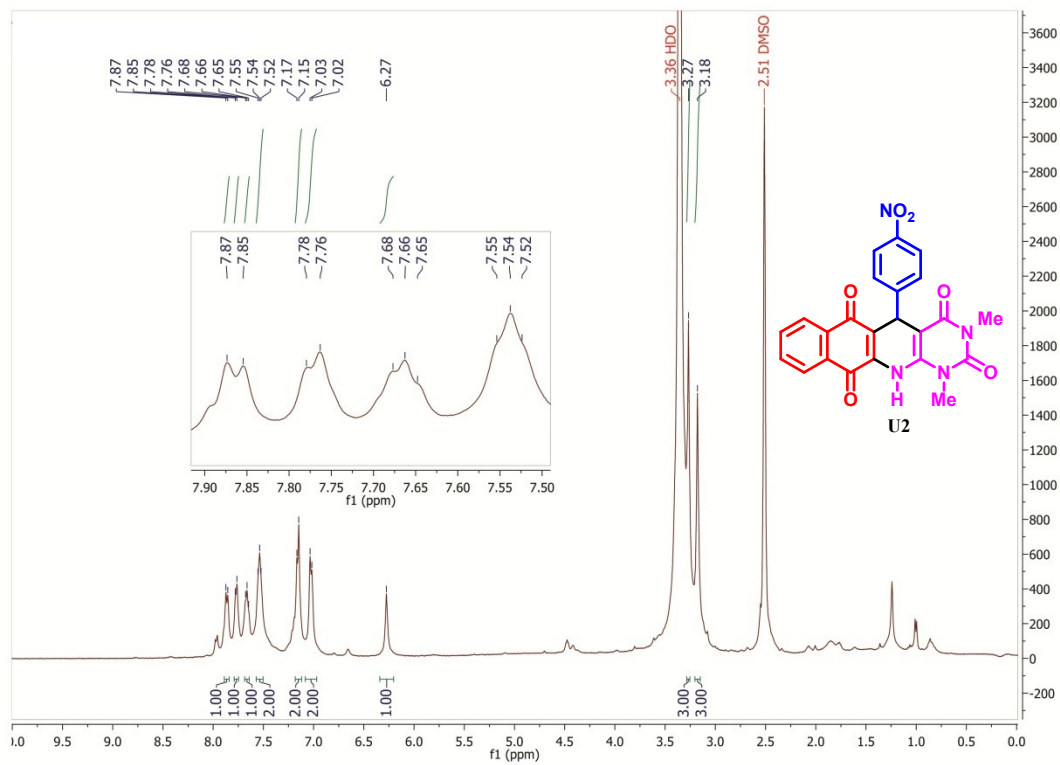

**<sup>1</sup>H NMR spectrum of 1,3-dimethyl-5-(4-nitrophenyl)-5,12-dihydrobenzo[*g*]pyrimido[4,5-*b*]quinoline-2,4,6,11(1*H*,3*H*)-tetraone (U2).**

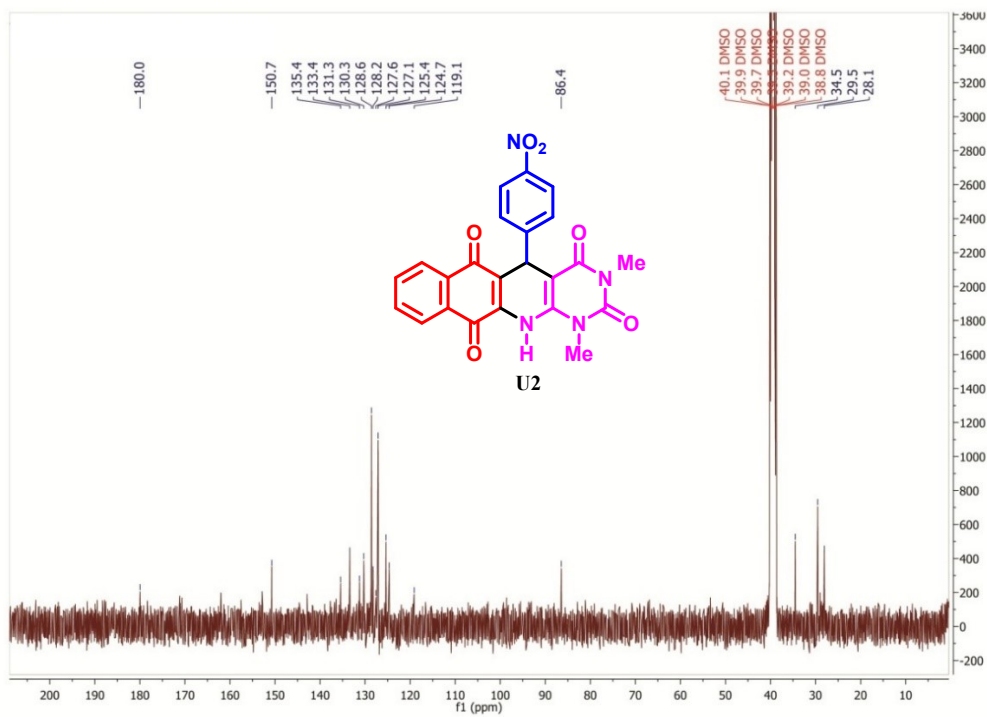

$^{13}\text{C}$  NMR spectrum of 1,3-dimethyl-5-(4-nitrophenyl)-5,12-dihydrobenzo[*g*]pyrimido[4,5-*b*]quinoline-2,4,6,11(1*H*,3*H*)-tetraone (U2).

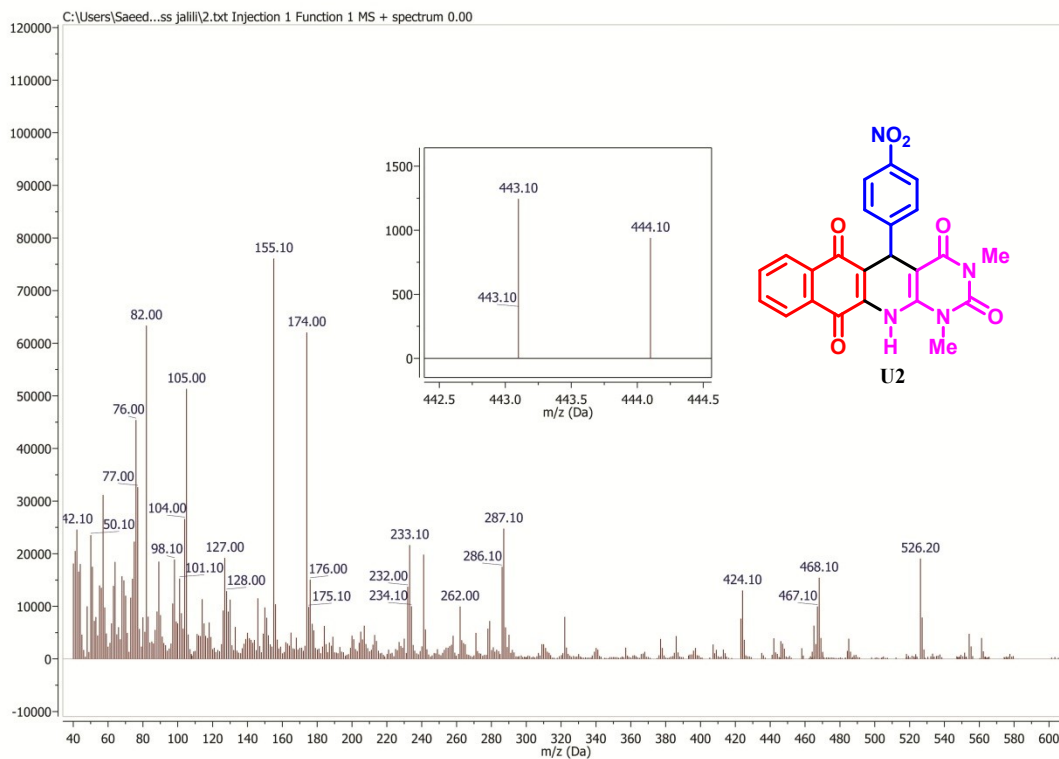

**Mass spectrum of 1,3-dimethyl-5-(4-nitrophenyl)-5,12-dihydrobenzo[g]pyrimido[4,5-b]quinoline-2,4,6,11(1*H*,3*H*)-tetraone (U2).**

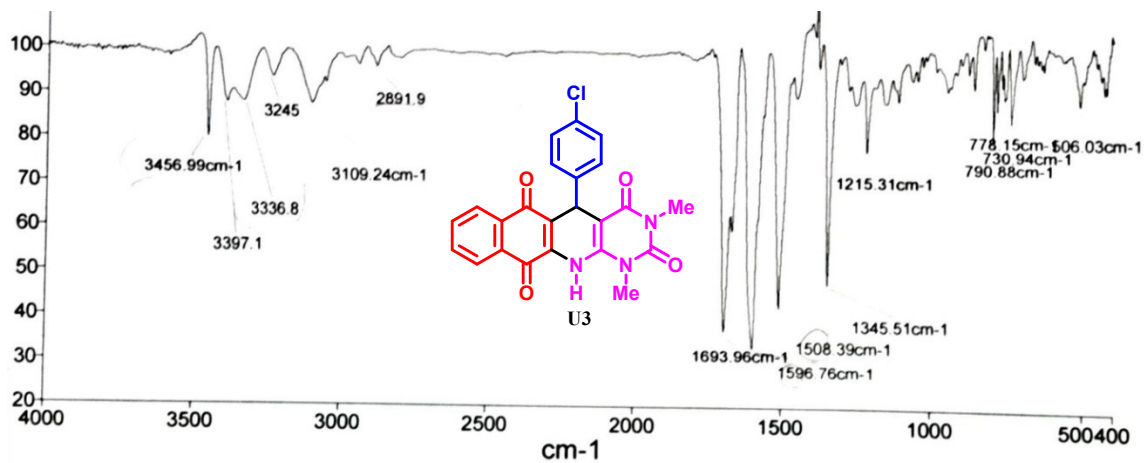

FT-IR spectrum of 5-(4-chlorophenyl)-1,3-dimethyl-5,12-dihydrobenzo[g]pyrimido[4,5-b]quinoline-2,4,6,11(1*H*,3*H*)-tetraone (U3).



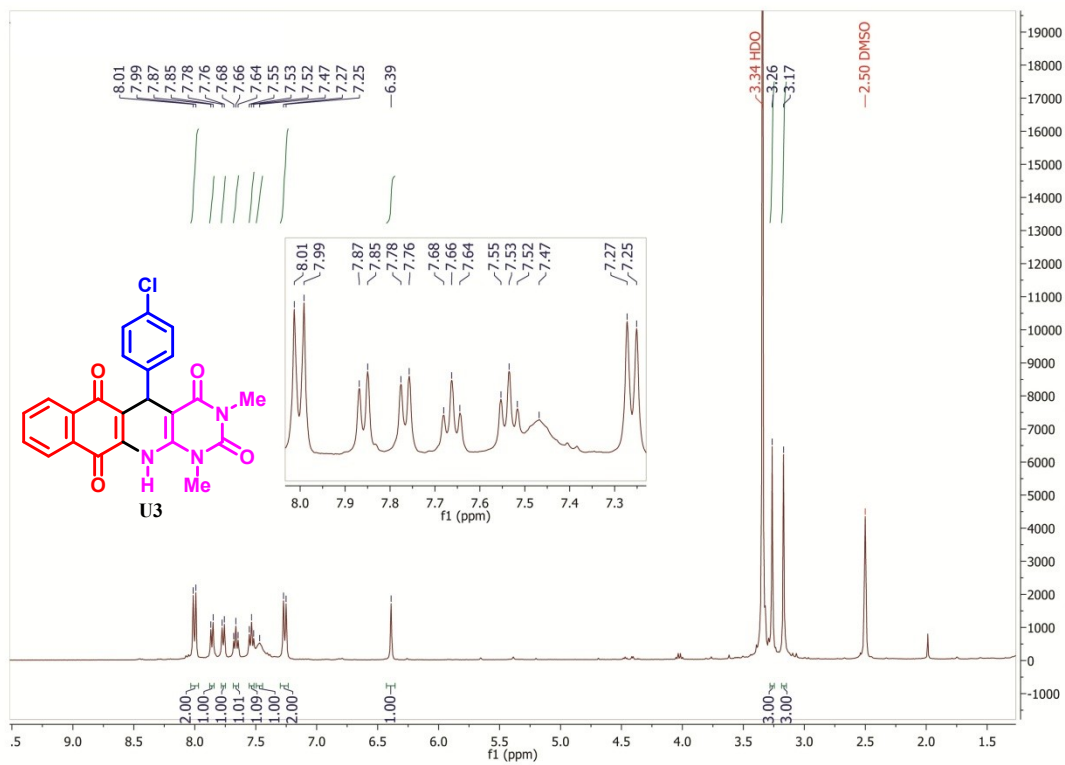

**<sup>1</sup>H NMR spectrum of 5-(4-chlorophenyl)-1,3-dimethyl-5,12-dihydrobenzo[g]pyrimido[4,5-*b*]quinoline-2,4,6,11(1*H*,3*H*)-tetraone (U3).**

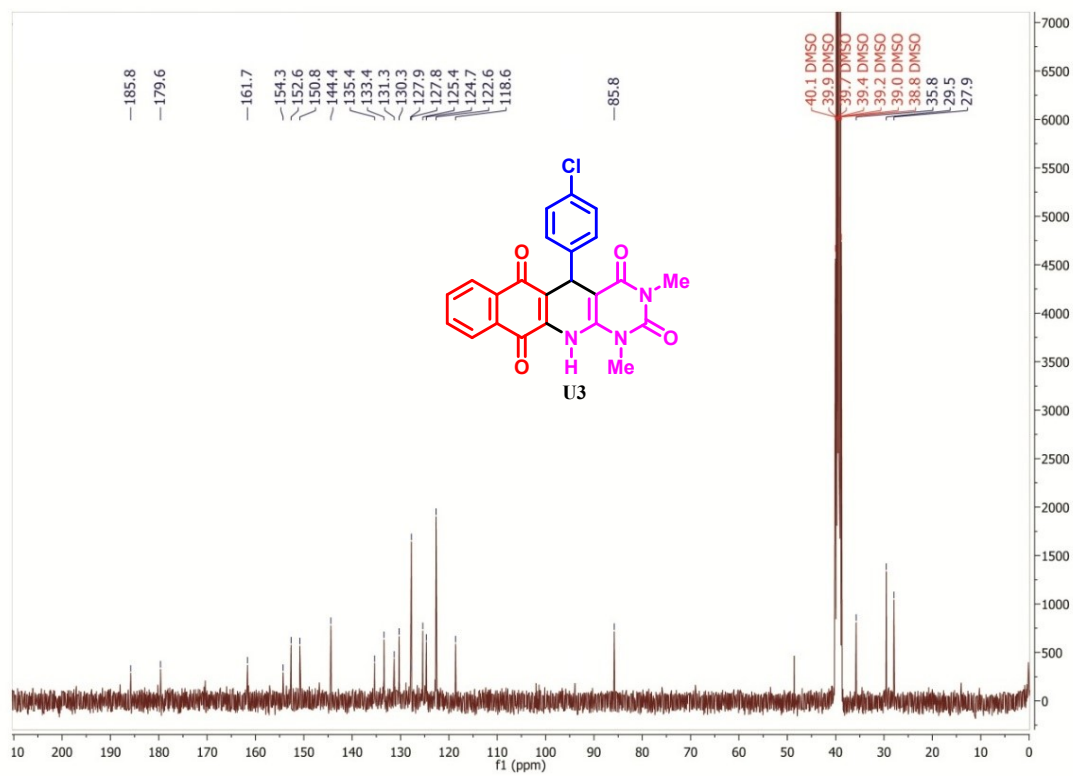

**<sup>13</sup>C NMR spectrum of 5-(4-chlorophenyl)-1,3-dimethyl-5,12-dihydrobenzo[*g*]pyrimido[4,5-*b*]quinoline-2,4,6,11(1*H*,3*H*)-tetraone (U3).**

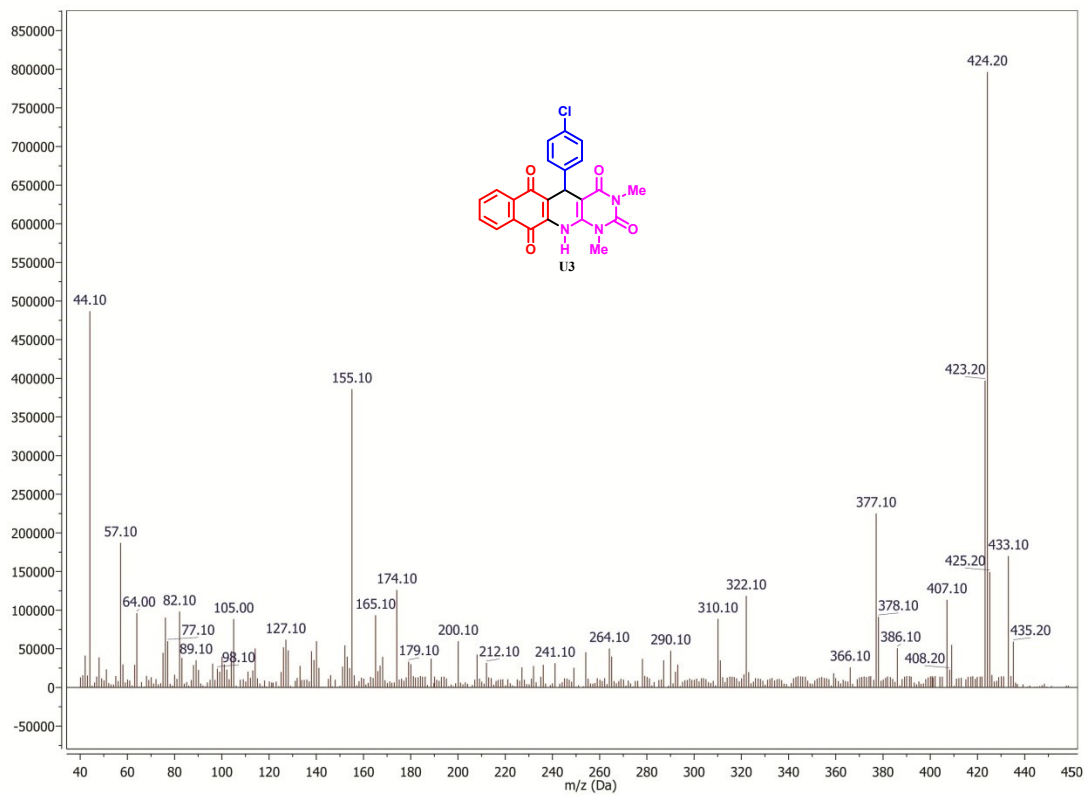

Mass spectrum of 5-(4-chlorophenyl)-1,3-dimethyl-5,12-dihydrobenzo[g]pyrimido[4,5-b]quinoline-2,4,6,11(1H,3H)-tetraone (U3).

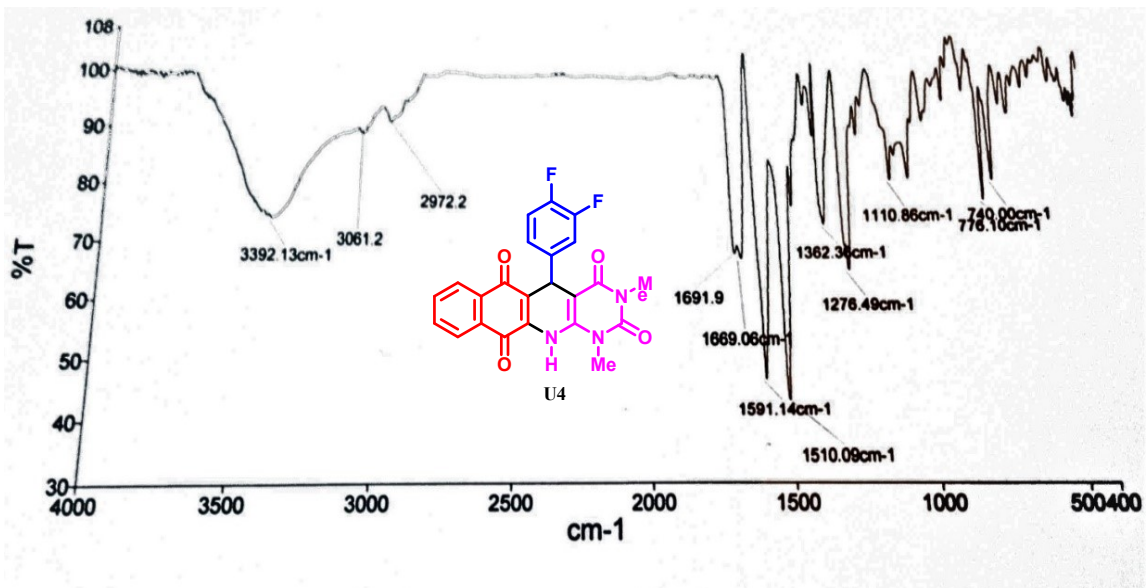

FT-IR spectrum of 5-(3,4-difluorophenyl)-1,3-dimethyl-5,12-dihydrobenzo[*g*]pyrimido[4,5-*b*]quinoline-2,4,6,11(1*H*,3*H*)-tetraone (U4).

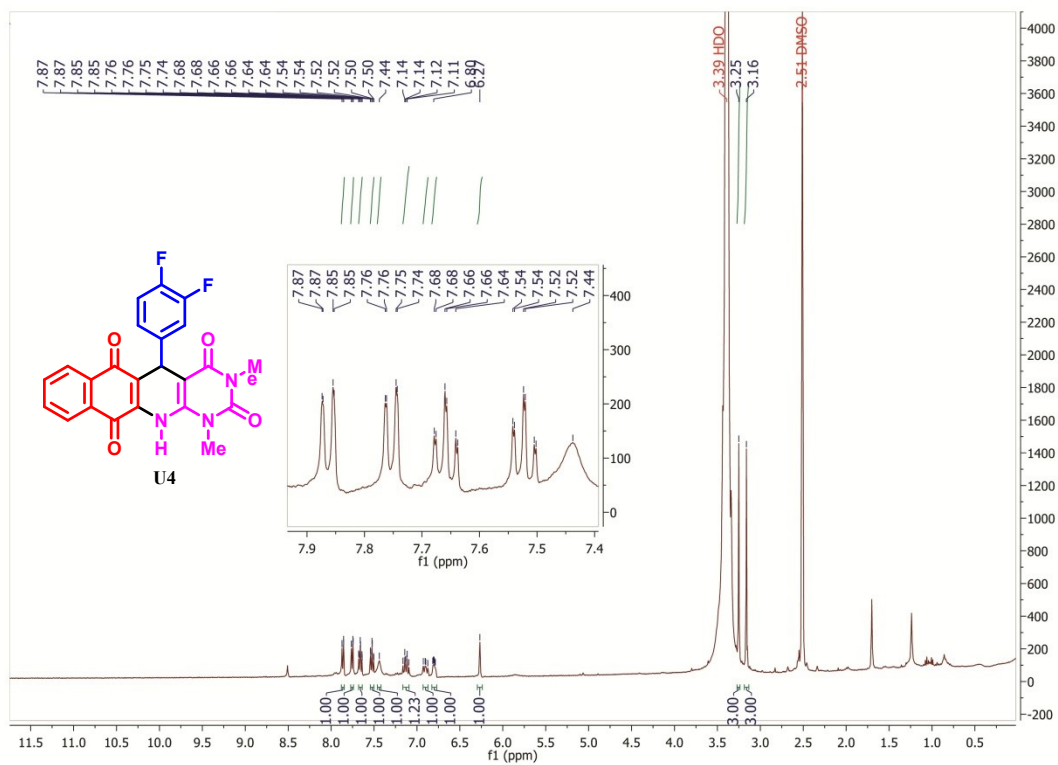

**<sup>1</sup>H NMR spectrum of 5-(3,4-difluorophenyl)-1,3-dimethyl-5,12-dihydrobenzo[g]pyrimido[4,5-*b*]quinoline-2,4,6,11(1*H*,3*H*)-tetraone (U4).**

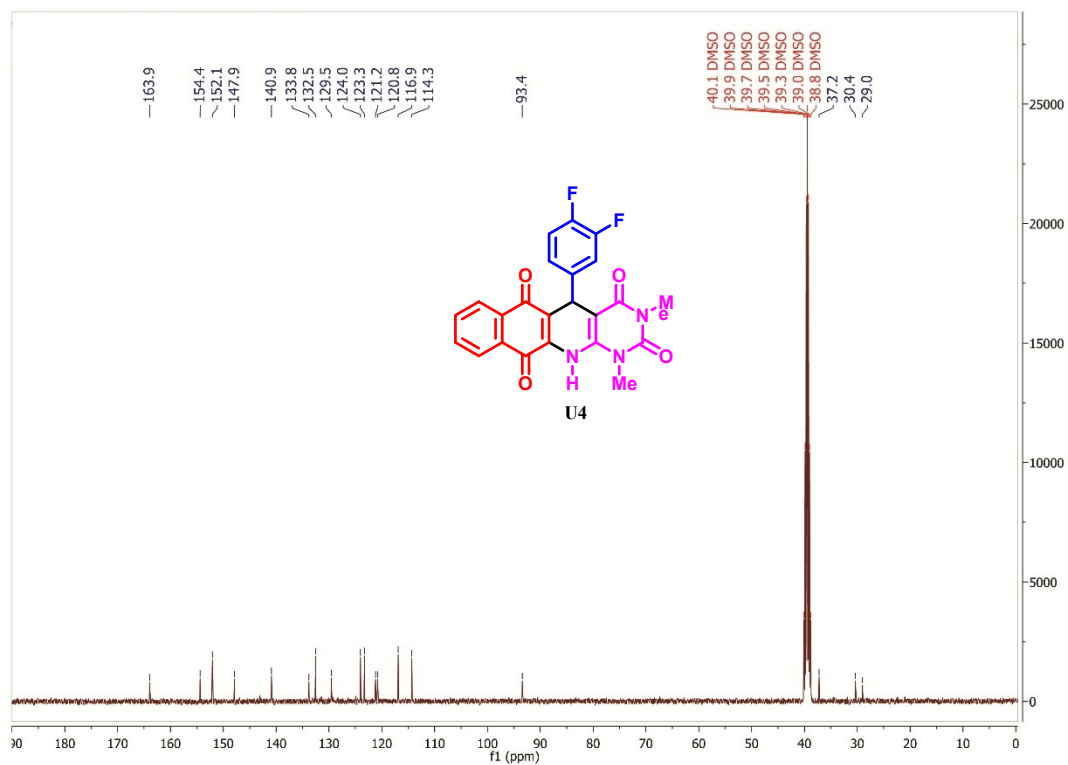

**<sup>13</sup>C NMR spectrum of 5-(3,4-difluorophenyl)-1,3-dimethyl-5,12-dihydrobenzo[g]pyrimido[4,5-b]quinoline-2,4,6,11(1*H*,3*H*)-tetraone (U4).**

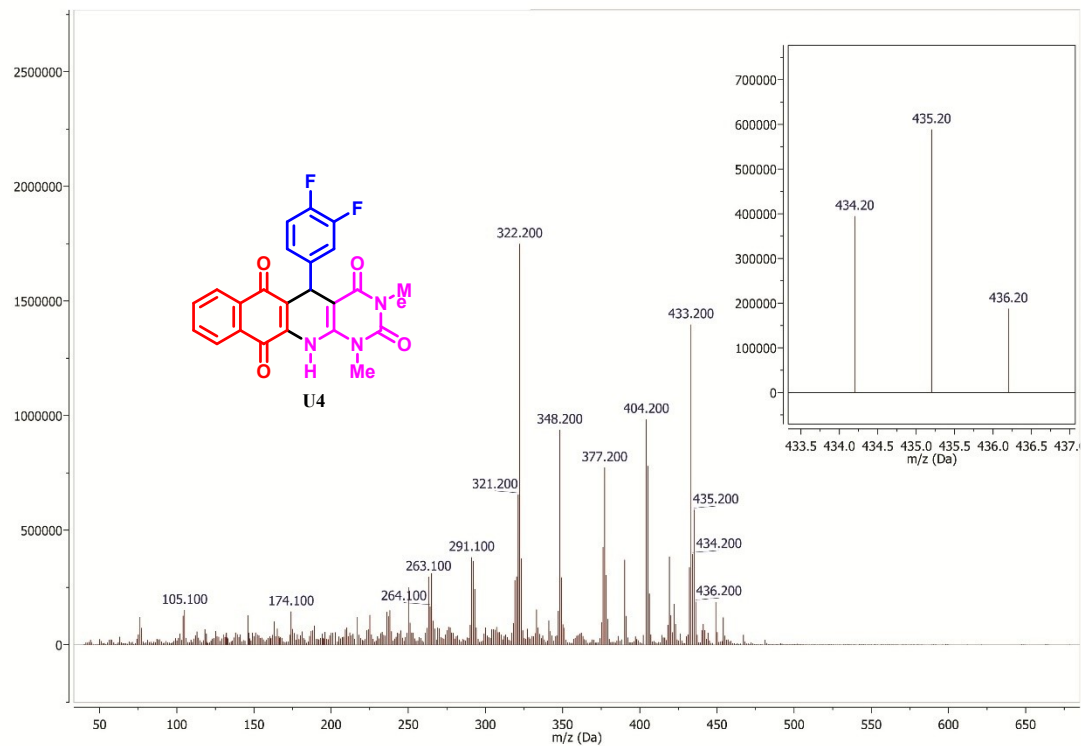

**Mass spectrum of 5-(3,4-difluorophenyl)-1,3-dimethyl-5,12-dihydrobenzo[g]pyrimido[4,5-b]quinoline-2,4,6,11(1*H*,3*H*)-tetraone (U4).**

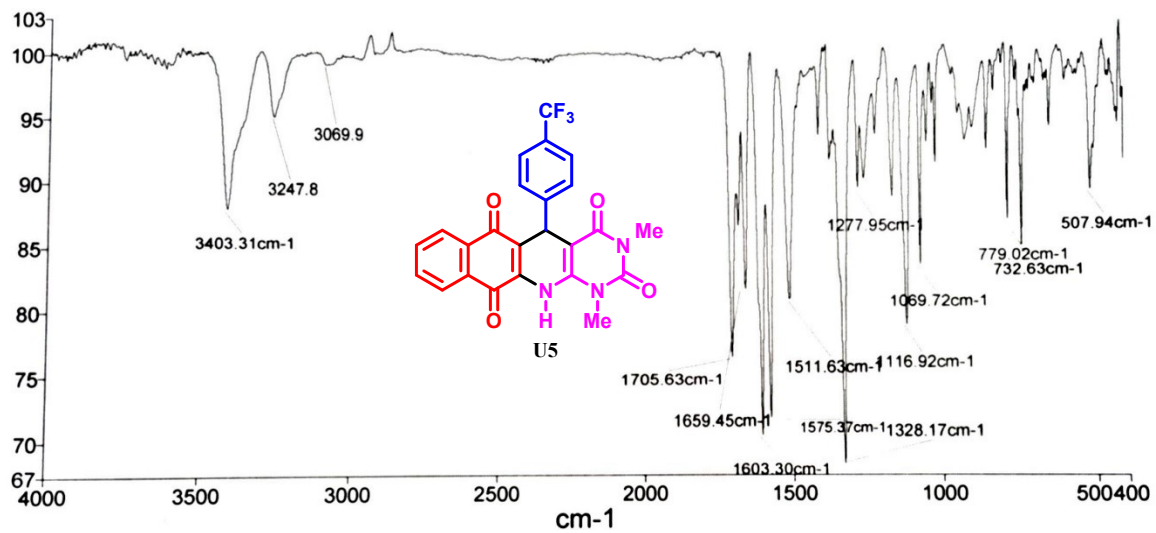

FT-IR spectrum of 1,3-dimethyl-5-(4-(trifluoromethyl)phenyl)-5,12-dihydrobenzo[g]pyrimido[4,5-*b*]quinoline-2,4,6,11(1*H*,3*H*)-tetraone (U5).



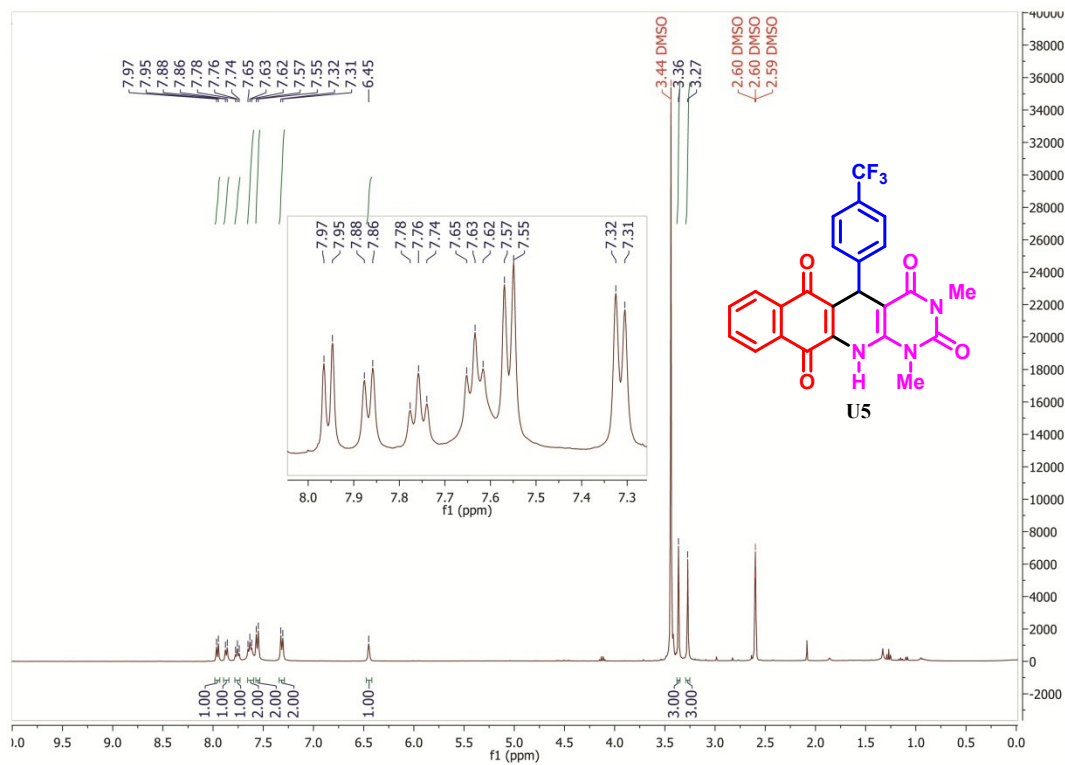

**<sup>1</sup>H NMR spectrum of 1,3-dimethyl-5-(4-(trifluoromethyl)phenyl)-5,12-dihydrobenzo[g]pyrimido[4,5-*b*]quinoline-2,4,6,11(1*H*,3*H*)-tetraone (U5).**

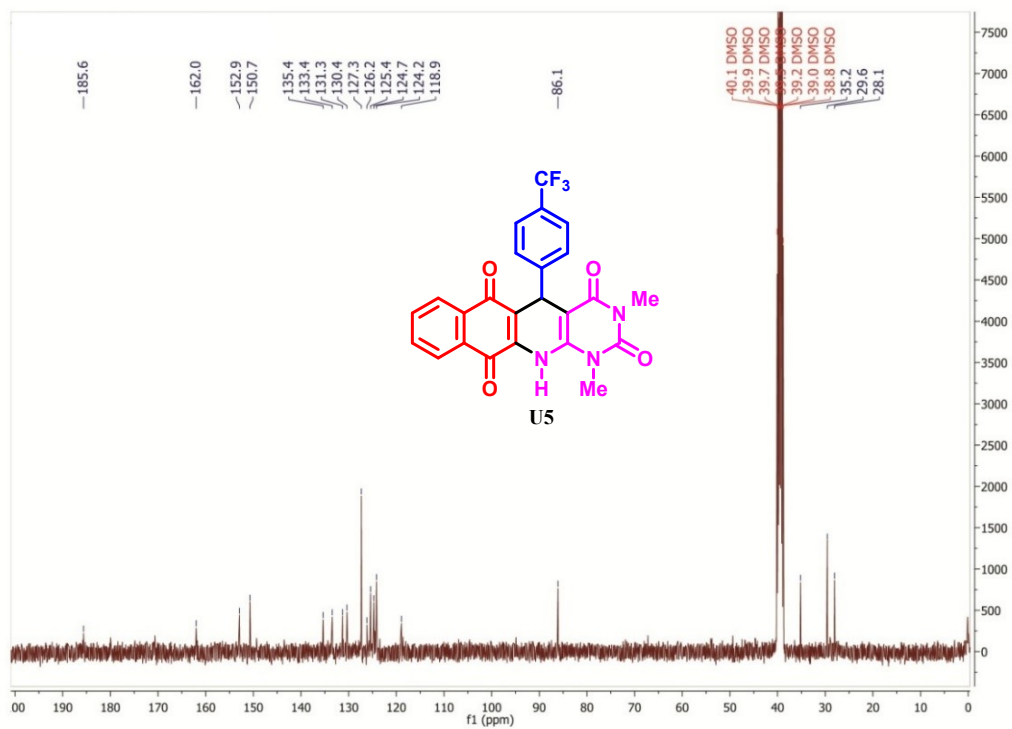

**<sup>13</sup>C NMR spectrum of 1,3-dimethyl-5-(4-(trifluoromethyl)phenyl)-5,12-dihydrobenzo[g]pyrimido[4,5-*b*]quinoline-2,4,6,11(1*H*,3*H*)-tetraone (U5).**

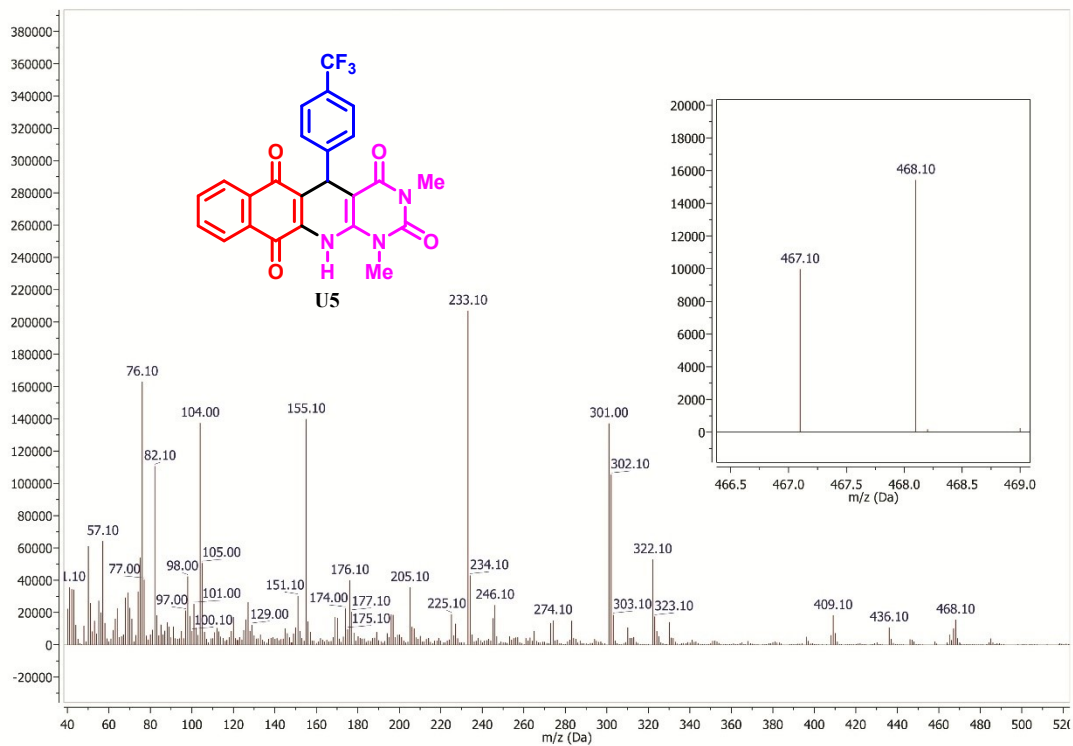

**Mass spectrum of 1,3-dimethyl-5-(4-(trifluoromethyl)phenyl)-5,12-dihydrobenzo[g]pyrimido[4,5-*b*]quinoline-2,4,6,11(1*H*,3*H*)-tetraone (U5).**

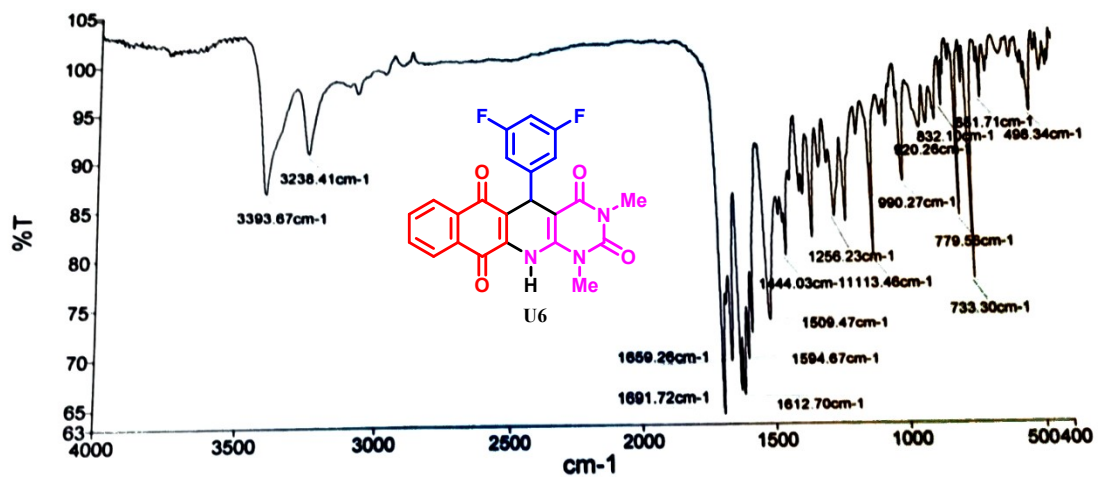

FT-IR spectrum of 5-(3,5-difluorophenyl)-1,3-dimethyl-5,12-dihydrobenzo[g]pyrimido[4,5-b]quinoline-2,4,6,11(1*H*,3*H*)-tetraone (U6).

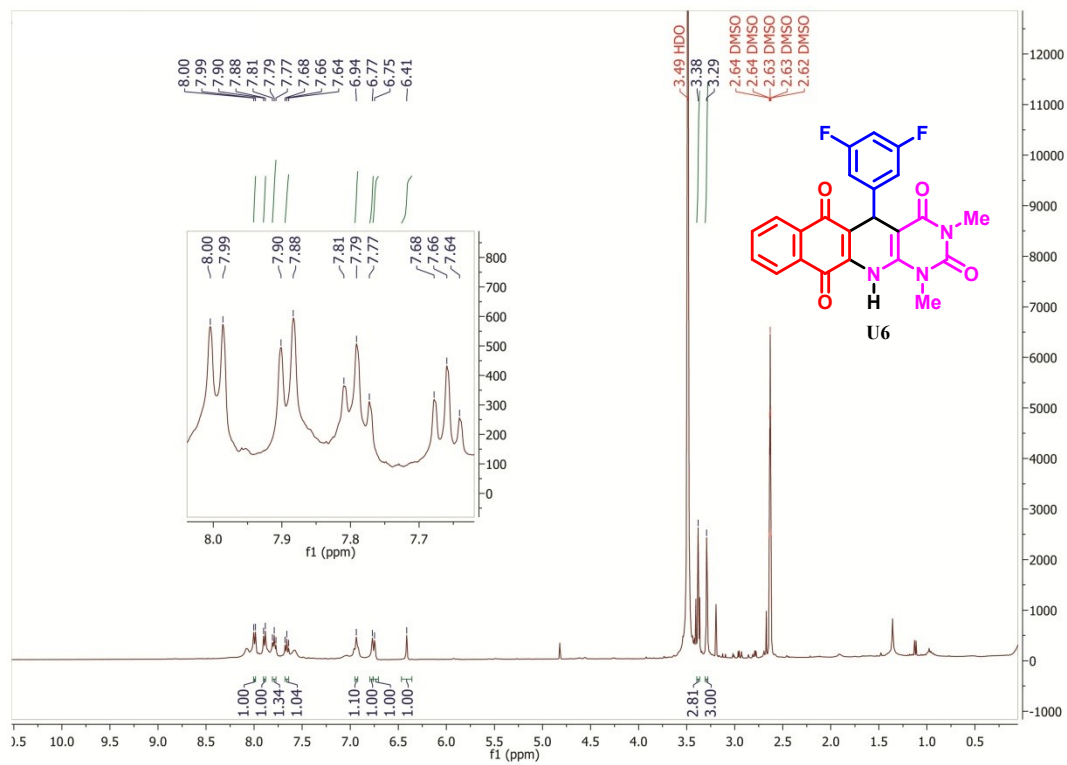

**<sup>1</sup>H NMR spectrum of 5-(3,5-difluorophenyl)-1,3-dimethyl-5,12-dihydrobenzo[g]pyrimido[4,5-b]quinoline-2,4,6,11(1*H*,3*H*)-tetraone (U6).**

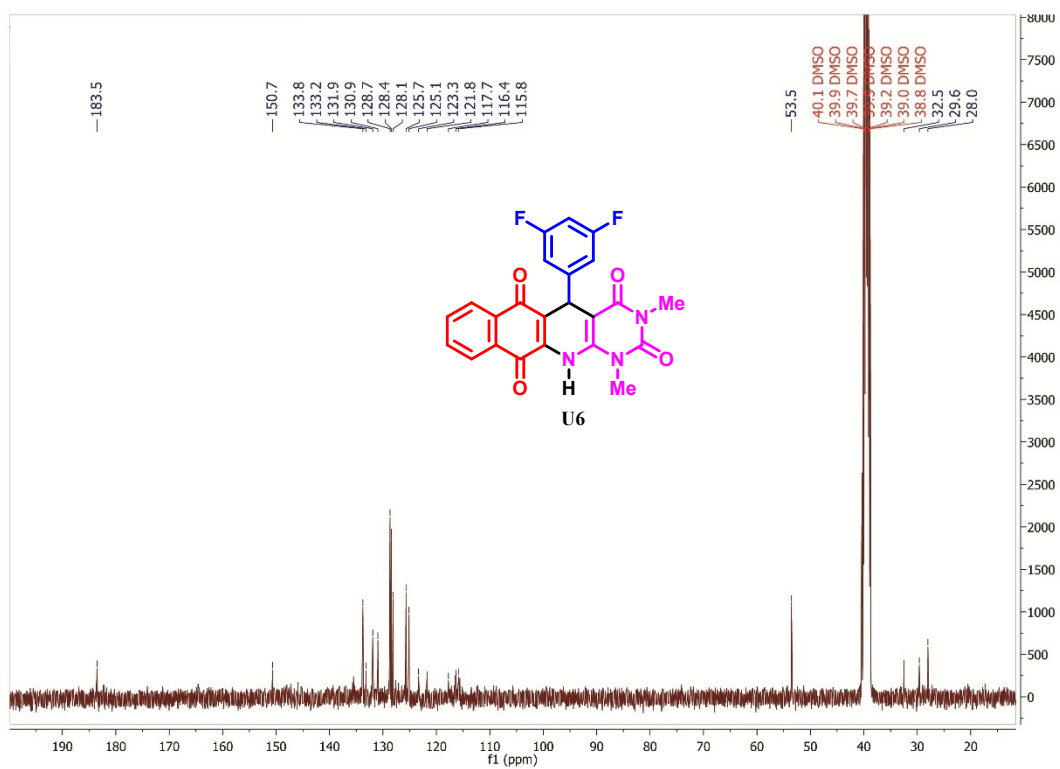

**<sup>13</sup>C NMR spectrum of 5-(3,5-difluorophenyl)-1,3-dimethyl-5,12-dihydrobenzo[g]pyrimido[4,5-*b*]quinoline-2,4,6,11(1*H*,3*H*)-tetraone (U6).**

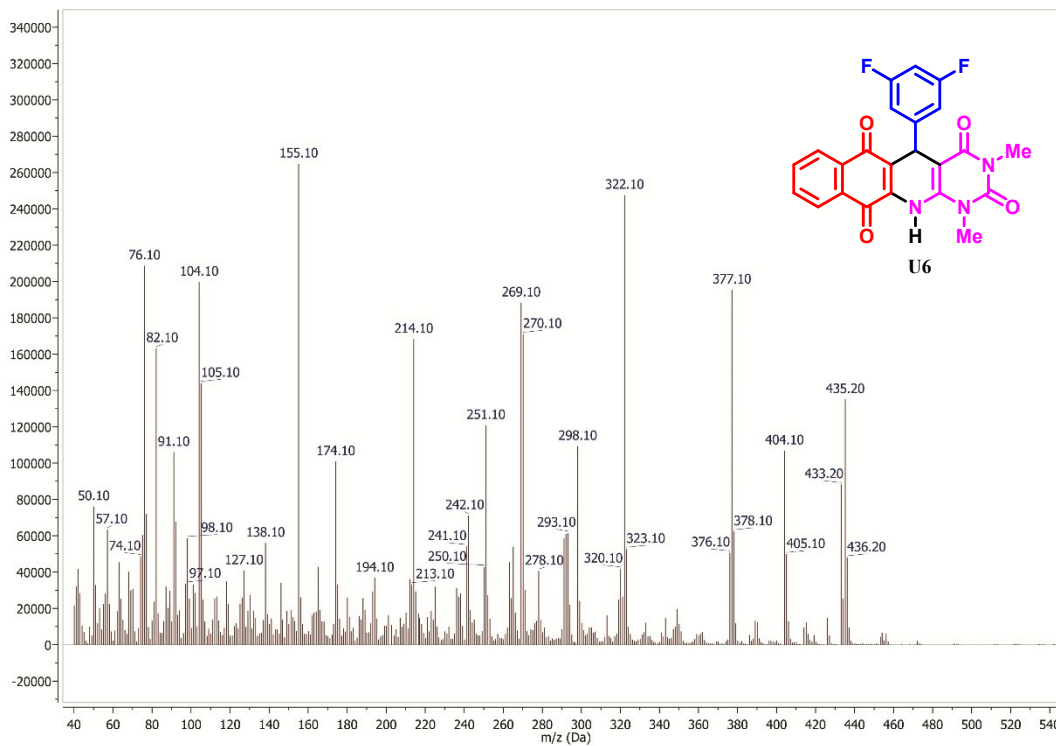

**Mass spectrum of 5-(3,5-difluorophenyl)-1,3-dimethyl-5,12-dihydrobenzo[g]pyrimido[4,5-b]quinoline-2,4,6,11(1*H*,3*H*)-tetraone (U6).**

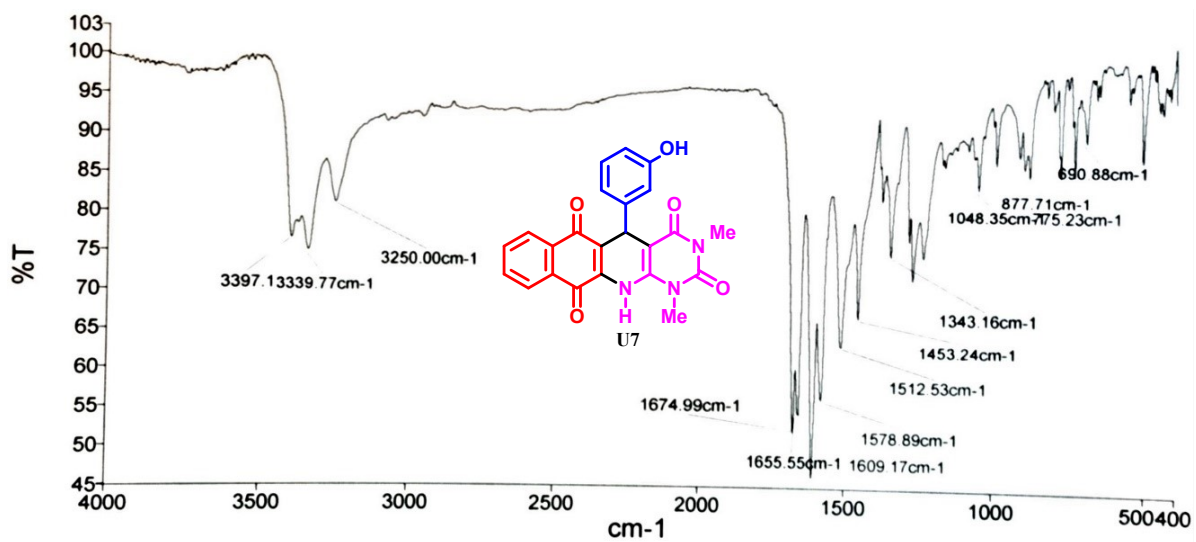

FT-IR spectrum of 5-(3-hydroxyphenyl)-1,3-dimethyl-5,12-dihydrobenzo[g]pyrimido[4,5-b]quinoline-2,4,6,11(1*H*,3*H*)-tetraone (U7).



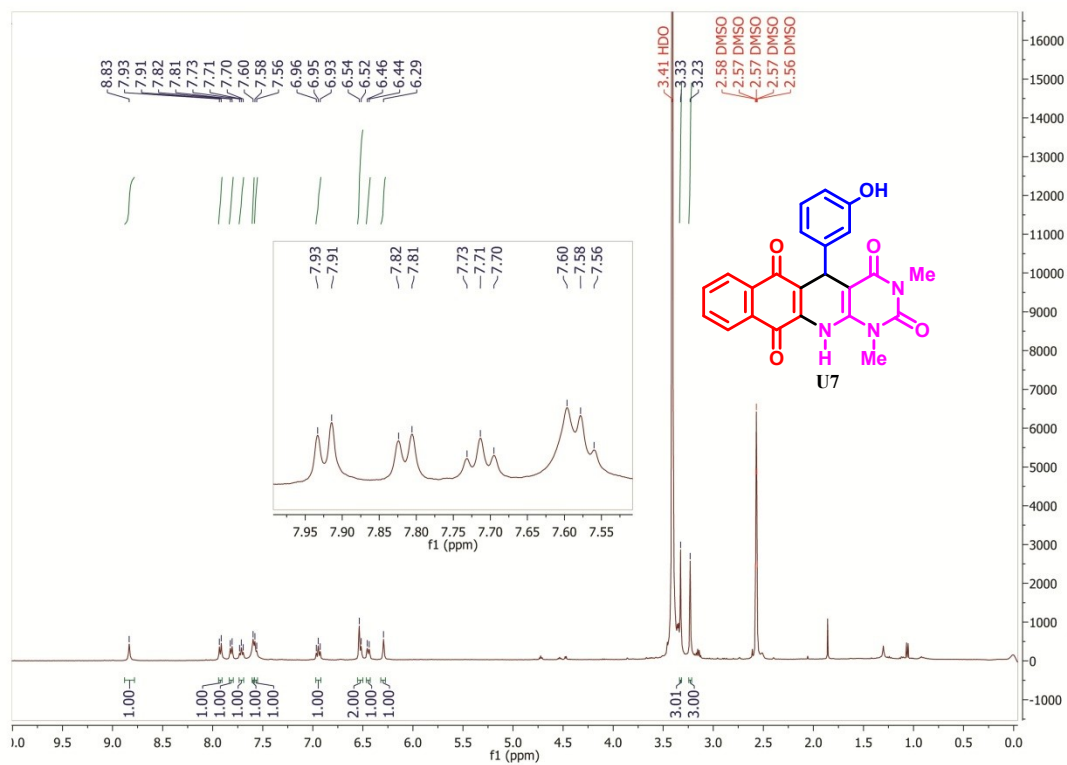

**<sup>1</sup>H NMR spectrum of 5-(3-hydroxyphenyl)-1,3-dimethyl-5,12-dihydrobenzo[g]pyrimido[4,5-*b*]quinoline-2,4,6,11(1*H*,3*H*)-tetraone (U7).**

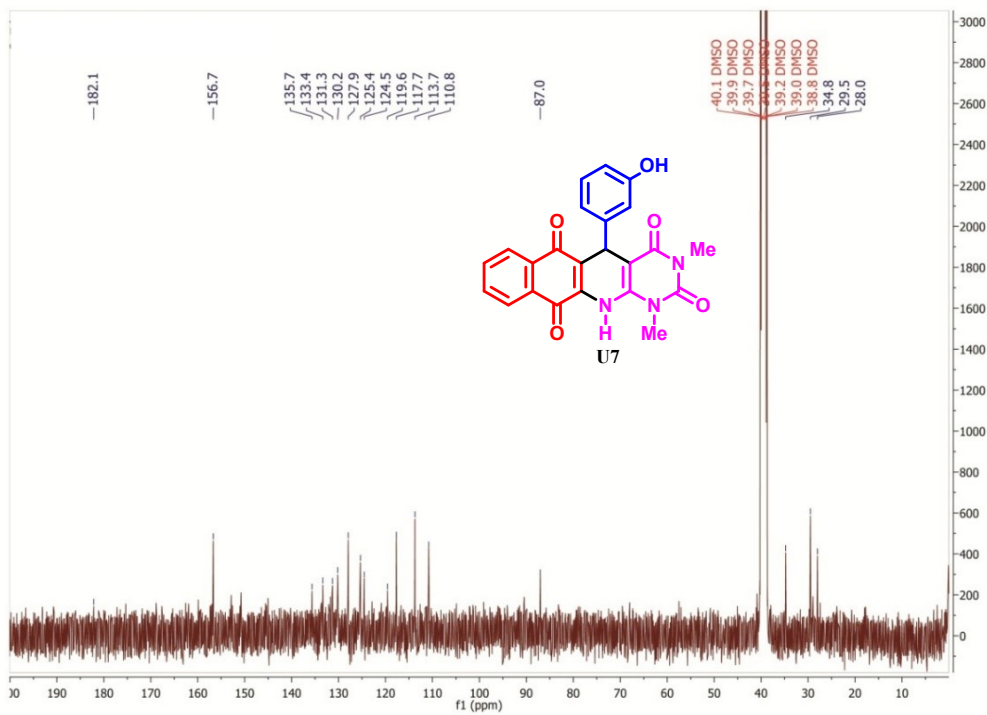

<sup>13</sup>C NMR spectrum of 5-(3-hydroxyphenyl)-1,3-dimethyl-5,12-dihydrobenzo[g]pyrimido[4,5-*b*]quinoline-2,4,6,11(1*H*,3*H*)-tetraone (U7).

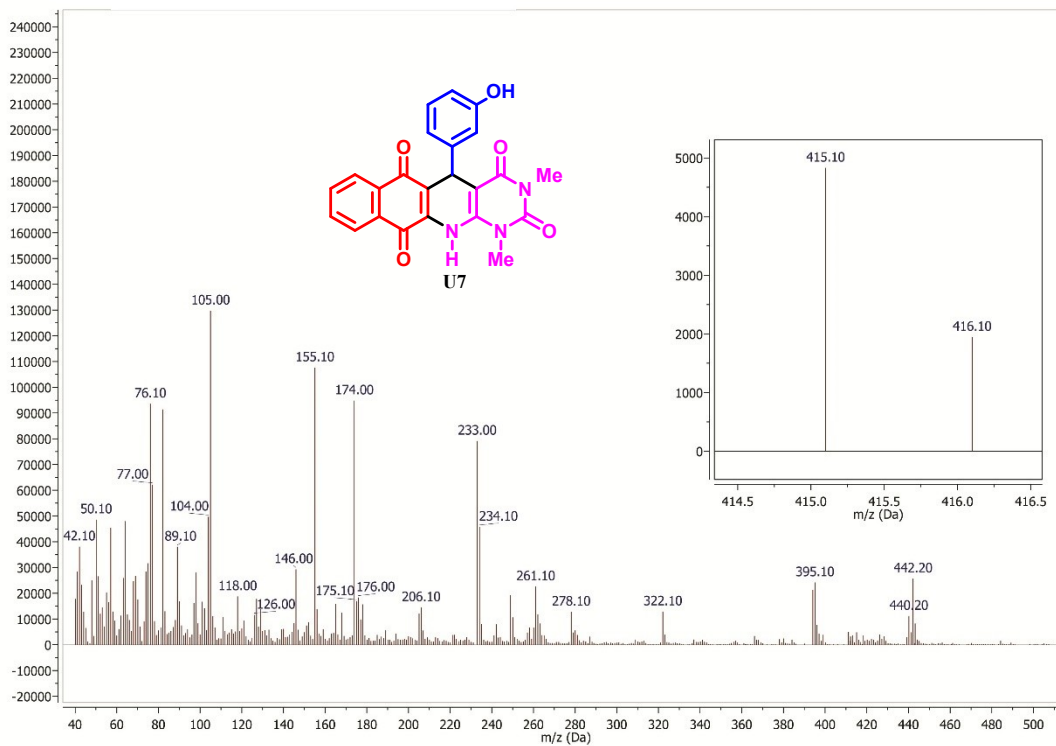

**Mass spectrum of 5-(3-hydroxyphenyl)-1,3-dimethyl-5,12-dihydrobenzo[g]pyrimido[4,5-b]quinoline-2,4,6,11(1*H*,3*H*)-tetraone (U7).**

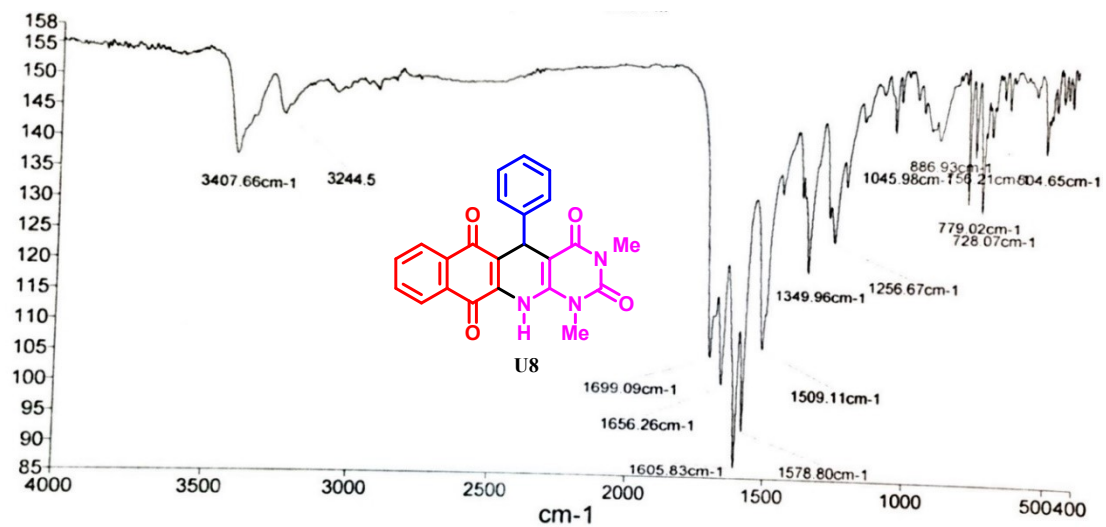

FT-IR spectrum of 1,3-dimethyl-5-phenyl-5,12-dihydrobenzo[g]pyrimido[4,5-b]quinoline-2,4,6,11(1*H*,3*H*)-tetraone (U8).

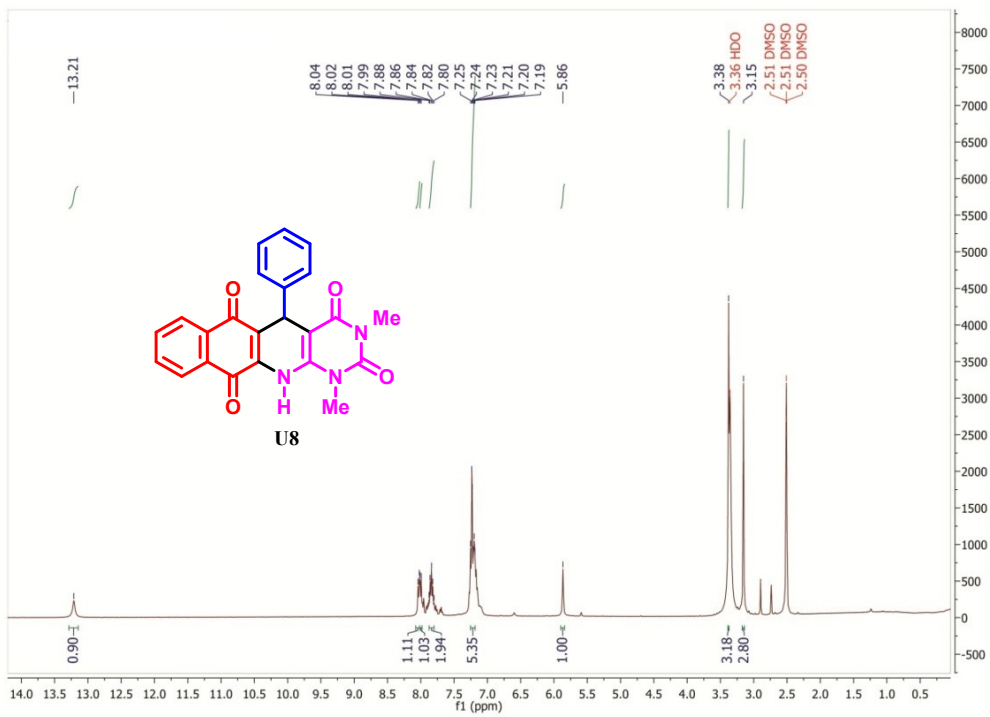

**<sup>1</sup>H NMR spectrum of 1,3-dimethyl-5-phenyl-5,12-dihydrobenzo[*g*]pyrimido[4,5-*b*]quinoline-2,4,6,11(1*H*,3*H*)-tetraone (U8).**

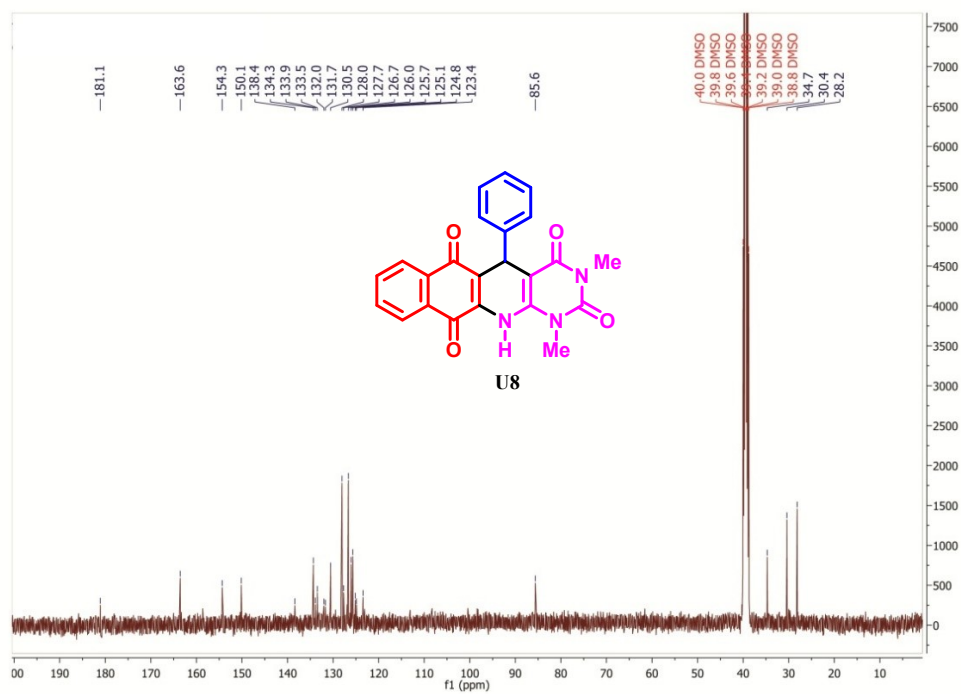

**<sup>13</sup>C NMR spectrum of 1,3-dimethyl-5-phenyl-5,12-dihydrobenzo[*g*]pyrimido[4,5-*b*]quinoline-2,4,6,11(1*H*,3*H*)-tetraone (U8).**

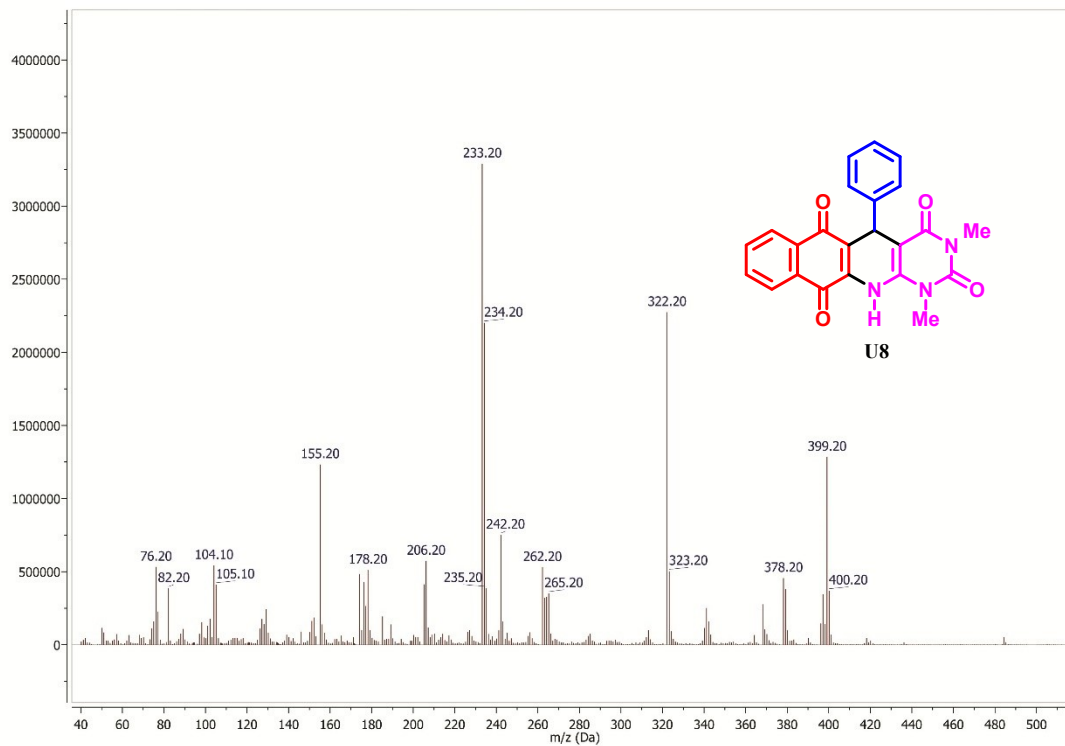

**Mass spectrum of 1,3-dimethyl-5-phenyl-5,12-dihydrobenzo[g]pyrimido[4,5-b]quinoline-2,4,6,11(1*H*,3*H*)-tetraone (U8).**

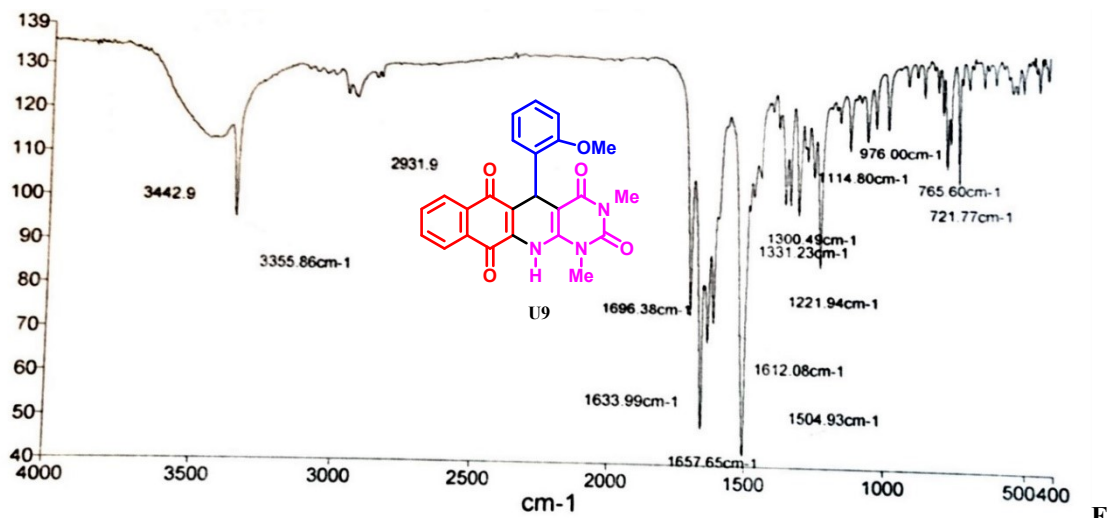

T-IR spectrum of 5-(2-methoxyphenyl)-1,3-dimethyl-5,12-dihydrobenzo[g]pyrimido[4,5-b]quinoline-2,4,6,11(1H,3H)-tetraone (U9).



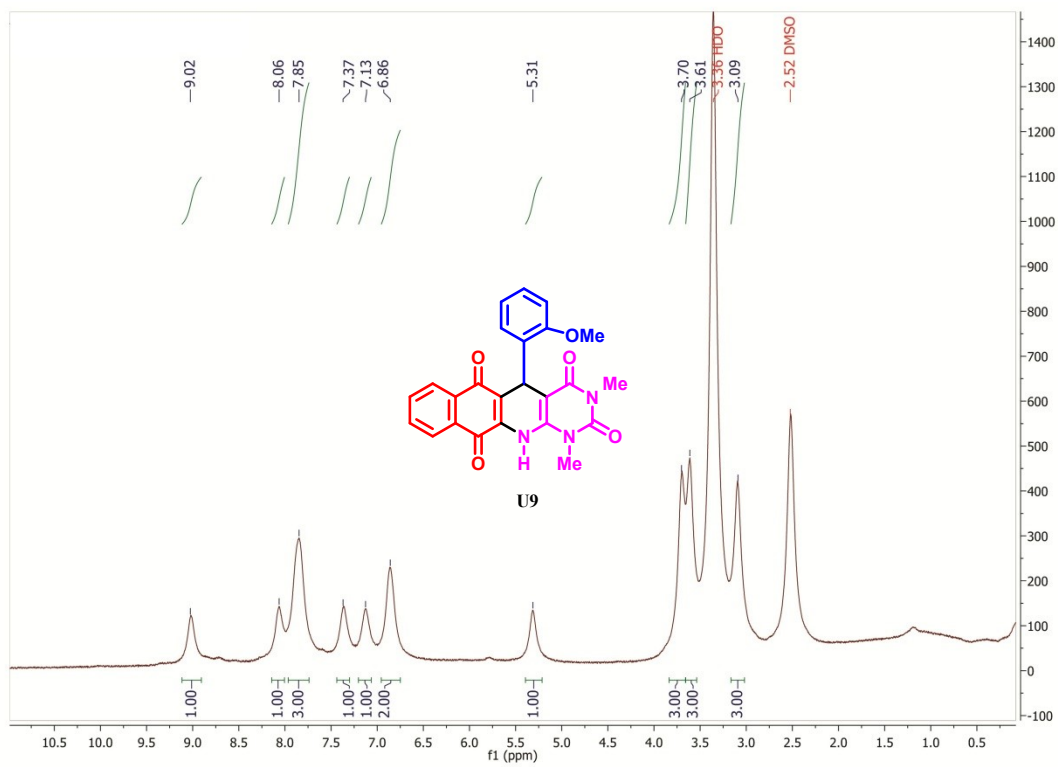

**<sup>1</sup>H NMR spectrum of 5-(2-methoxyphenyl)-1,3-dimethyl-5,12-dihydrobenzo[*g*]pyrimido[4,5-*b*]quinoline-2,4,6,11(1*H*,3*H*)-tetraone (U9).**

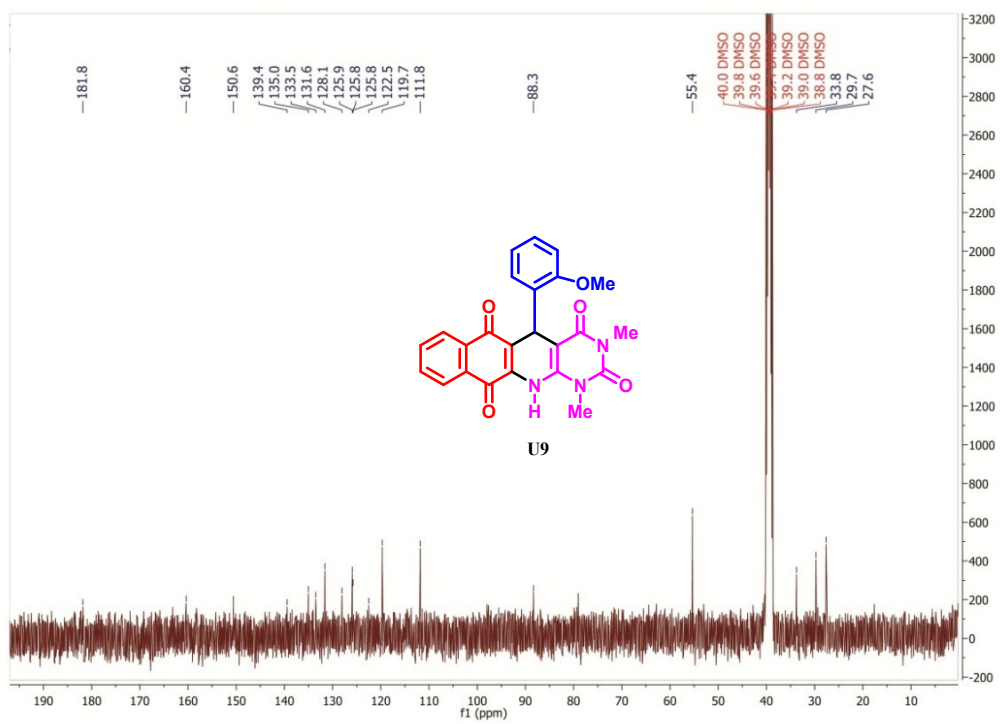

**<sup>13</sup>C NMR spectrum of 5-(2-methoxyphenyl)-1,3-dimethyl-5,12-dihydrobenzo[g]pyrimido[4,5-*b*]quinoline-2,4,6,11(1*H*,3*H*)-tetraone (U9).**

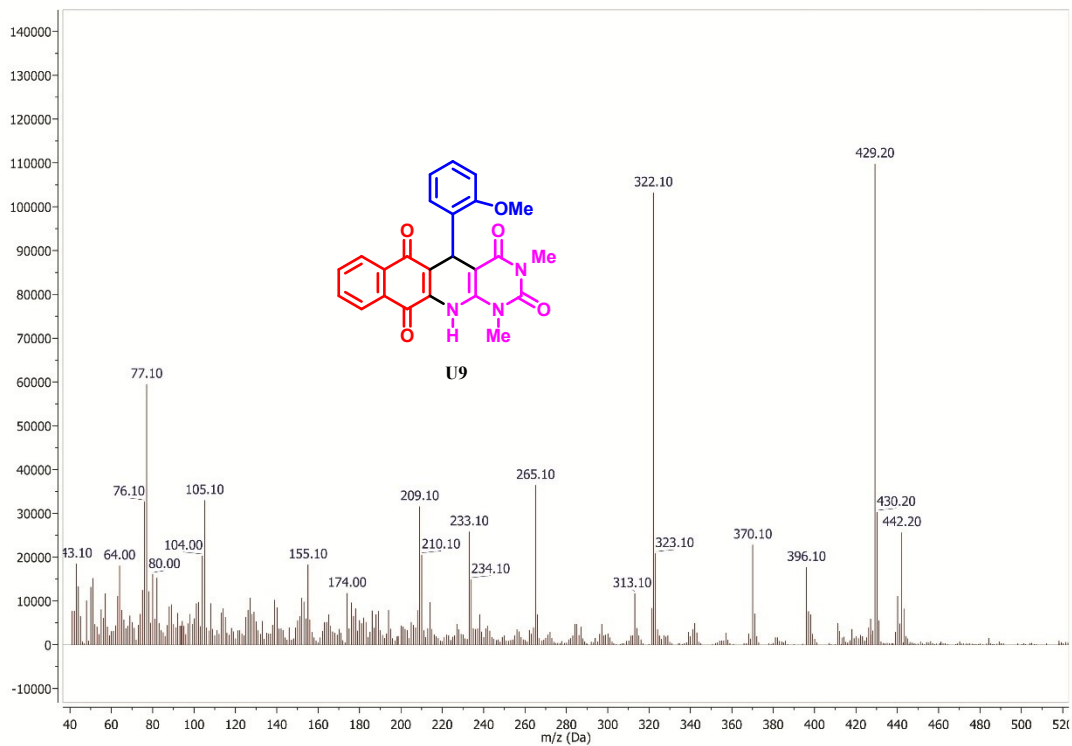

**Mass spectrum of 5-(2-methoxyphenyl)-1,3-dimethyl-5,12-dihydrobenzo[g]pyrimido[4,5-b]quinoline-2,4,6,11(1*H*,3*H*)-tetraone (U9).**

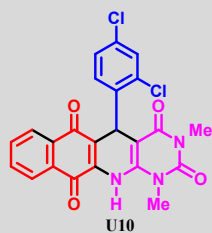

**FT-IR spectrum of 5-(2,4-dichlorophenyl)-1,3-dimethyl-5,12-dihydrobenzo[g]pyrimido[4,5-b]quinoline-2,4,6,11(1*H*,3*H*)-tetraone (U10).**

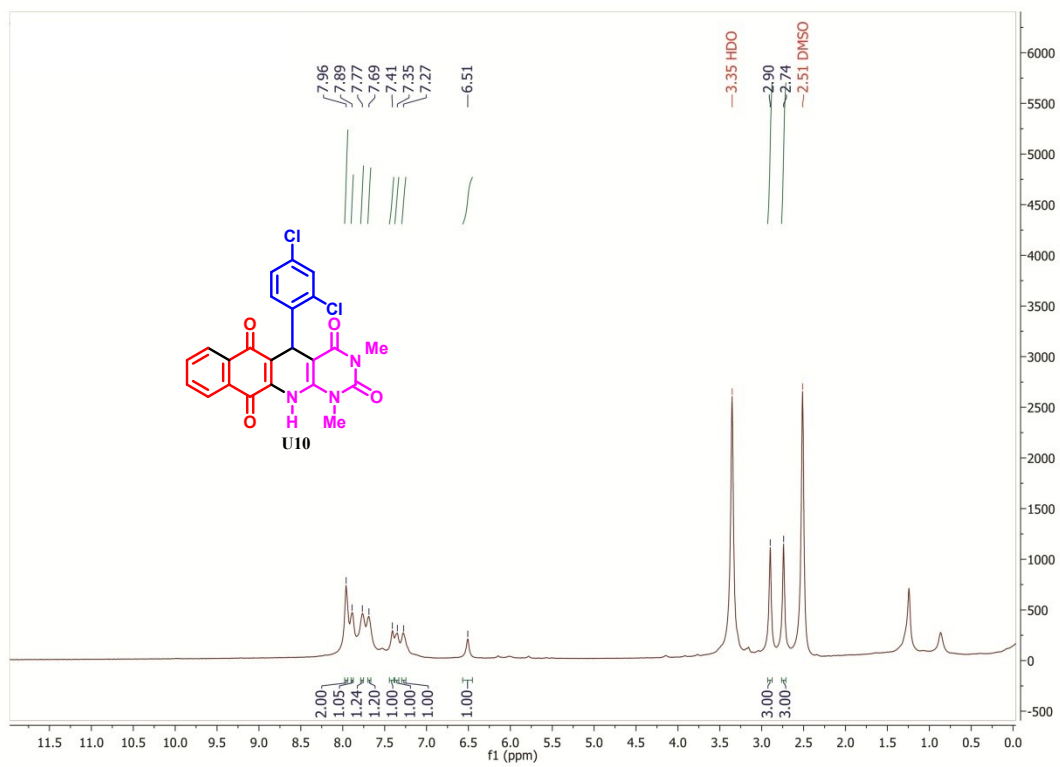

**<sup>1</sup>H NMR spectrum of 5-(2,4-dichlorophenyl)-1,3-dimethyl-5,12-dihydrobenzo[g]pyrimido[4,5-*b*]quinoline-2,4,6,11(1*H*,3*H*)-tetraone (U10).**

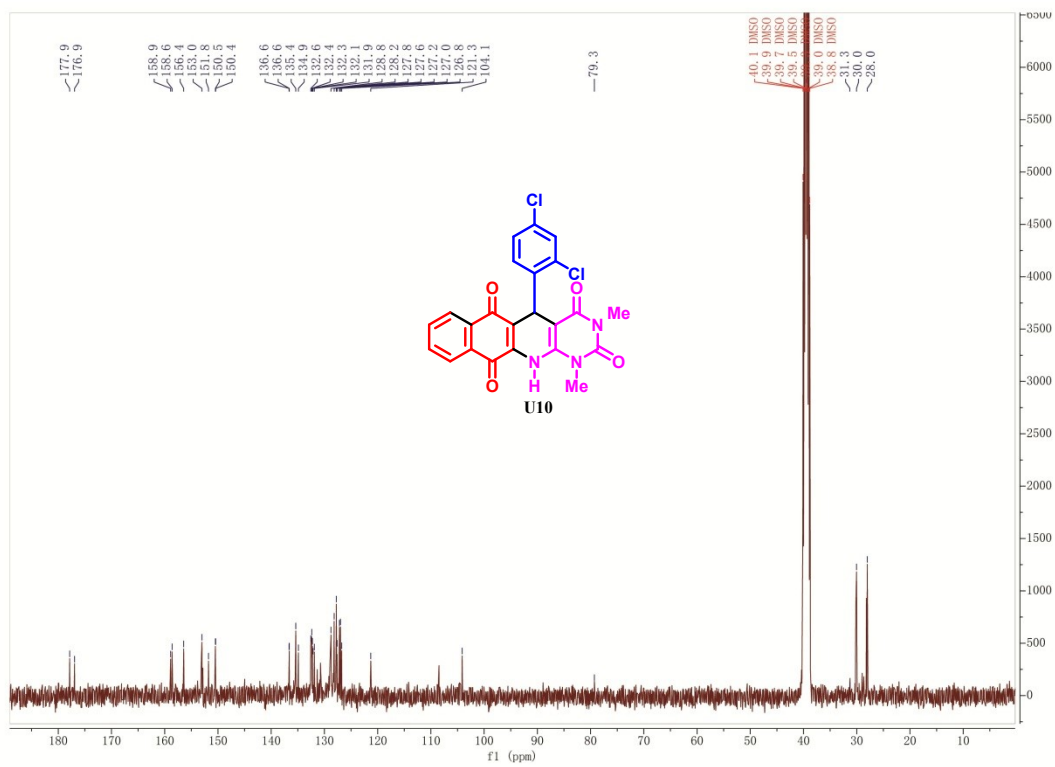

**<sup>13</sup>C NMR spectrum of 5-(2,4-dichlorophenyl)-1,3-dimethyl-5,12-dihydrobenzo[g]pyrimido[4,5-b]quinoline-2,4,6,11(1*H*,3*H*)-tetraone (U10).**

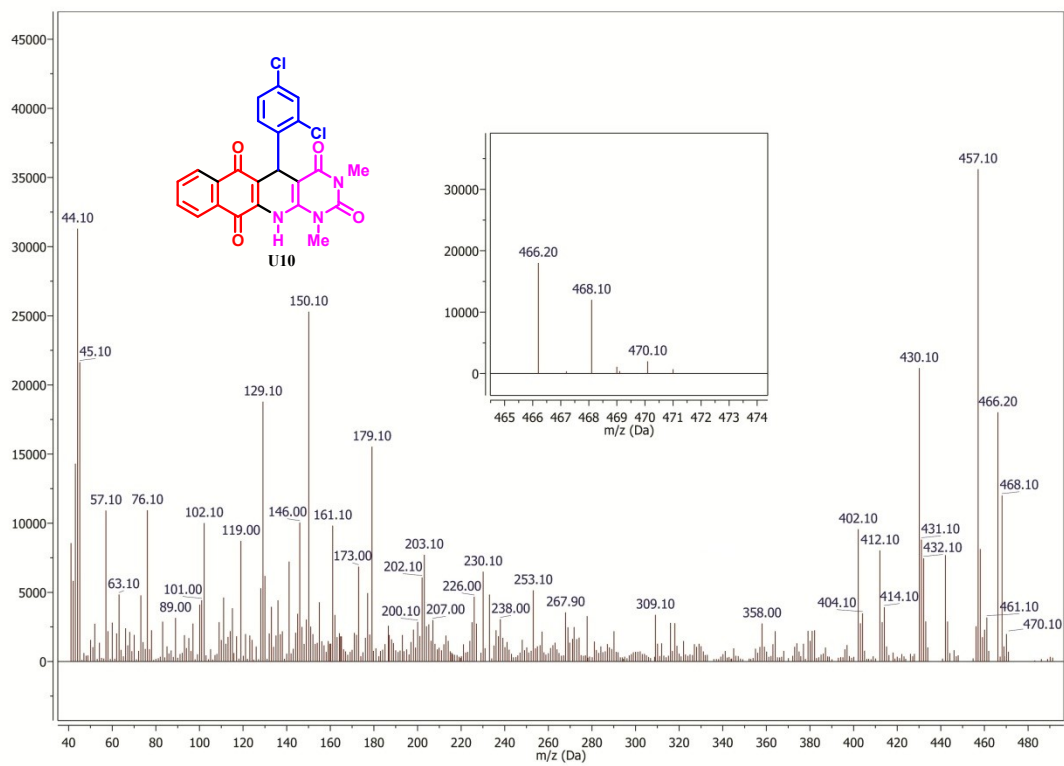

Mass spectrum of 5-(2,4-dichlorophenyl)-1,3-dimethyl-5,12-dihydrobenzo[g]pyrimido[4,5-b]quinoline-2,4,6,11(1*H*,3*H*)-tetraone (U10).

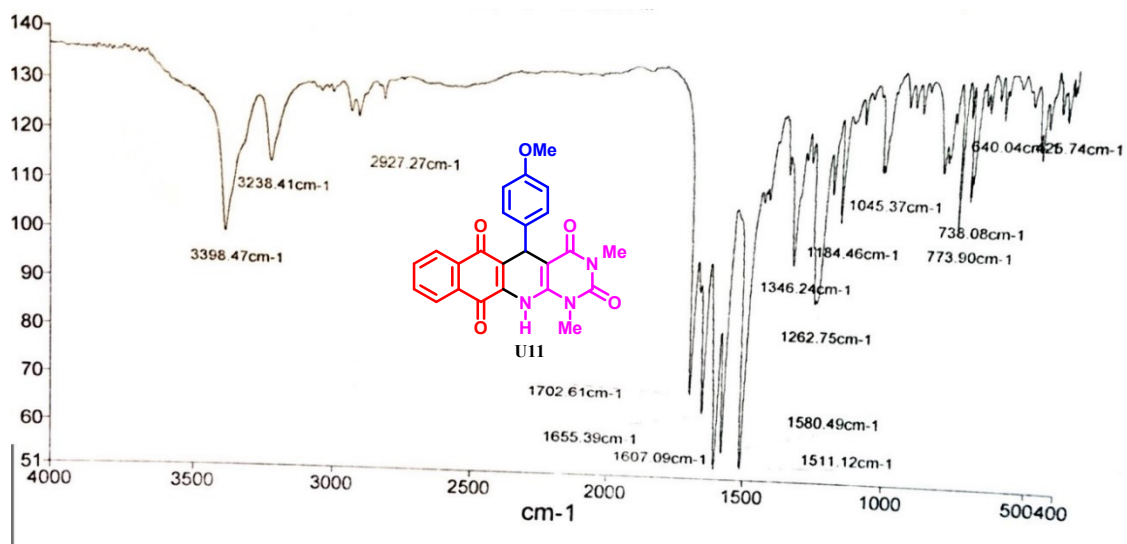

**FT-IR spectrum of 5-(4-methoxyphenyl)-1,3-dimethyl-5,12-dihydrobenzo[g]pyrimido[4,5-b]quinoline-2,4,6,11(1*H*,3*H*)-tetraone (U11).**



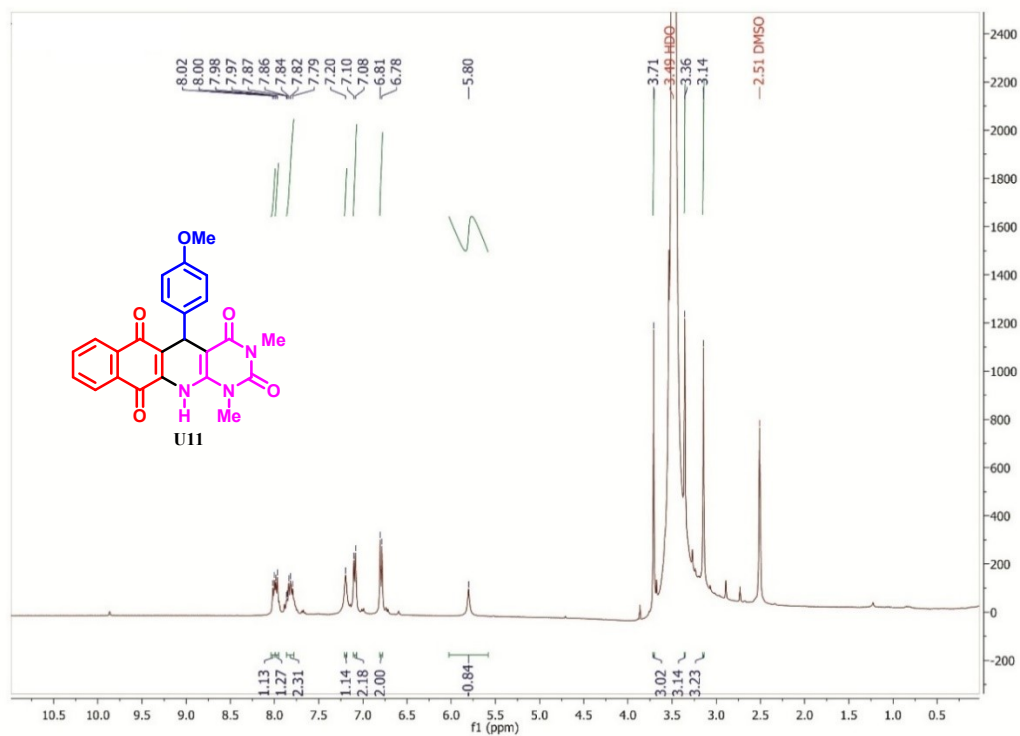

**<sup>1</sup>H NMR spectrum of 5-(4-methoxyphenyl)-1,3-dimethyl-5,12-dihydrobenzo[g]pyrimido[4,5-*b*]quinoline-2,4,6,11(1*H*,3*H*)-tetraone (U11).**

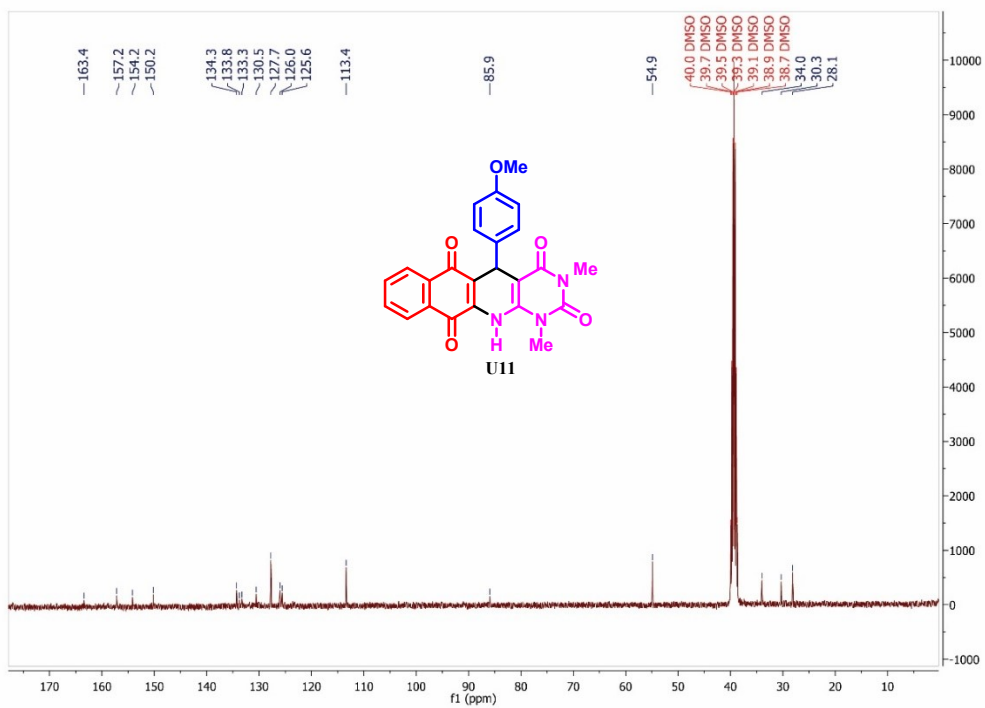

<sup>13</sup>C NMR spectrum of 5-(4-methoxyphenyl)-1,3-dimethyl-5,12-dihydrobenzo[g]pyrimido[4,5-*b*]quinoline-2,4,6,11(1*H*,3*H*)-tetraone (U11).

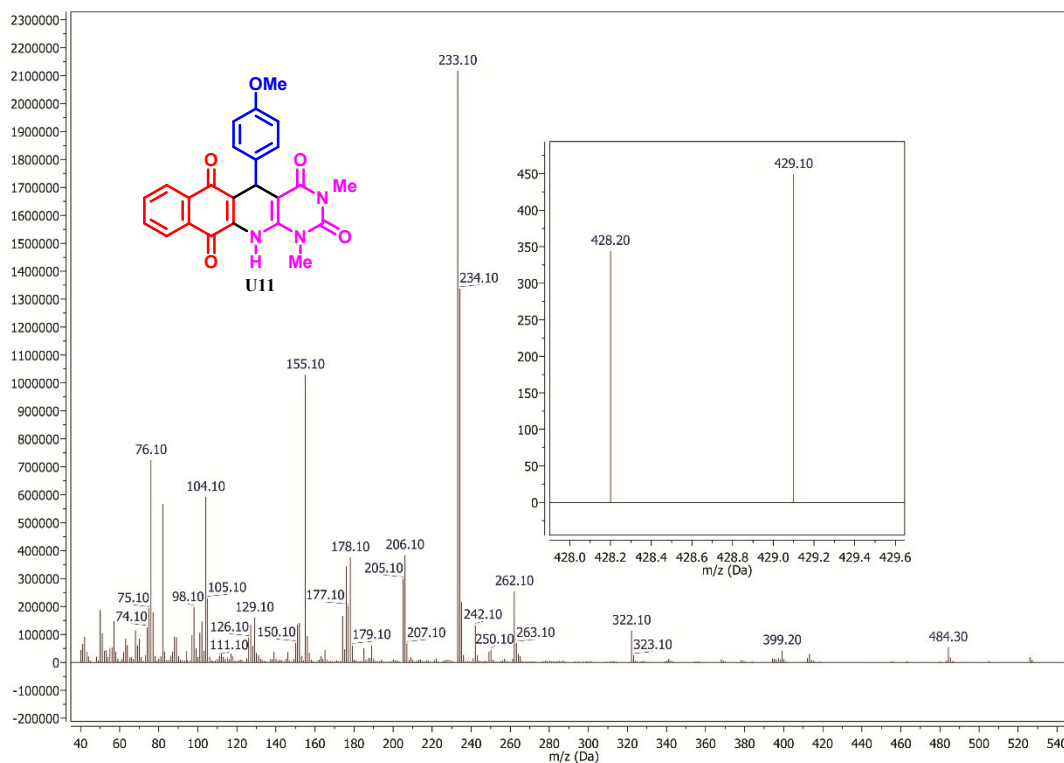

**Mass spectrum of 5-(4-methoxyphenyl)-1,3-dimethyl-5,12-dihydrobenzo[g]pyrimido[4,5-*b*]quinoline-2,4,6,11(1*H*,3*H*)-tetraone (U11).**

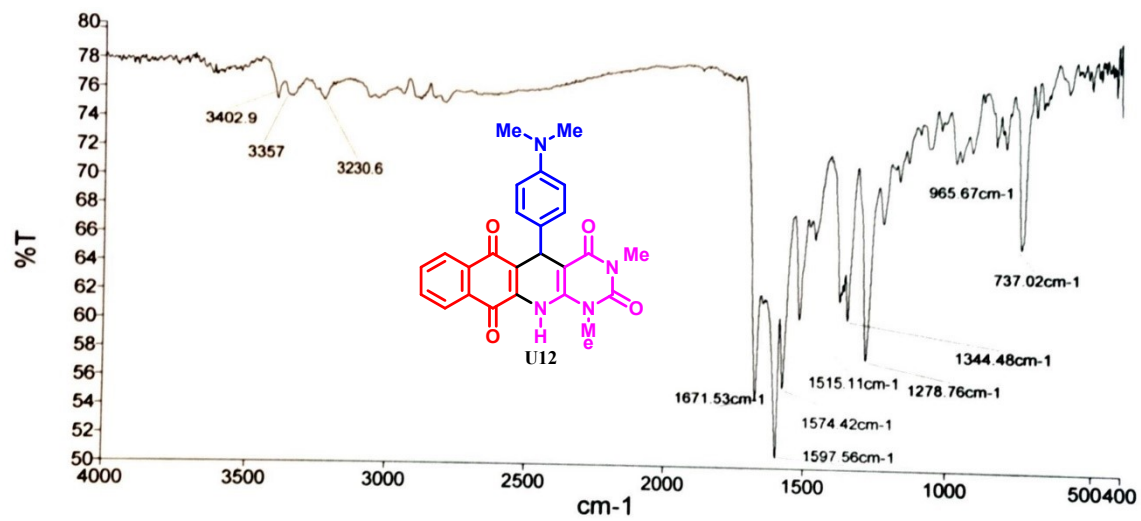

FT-IR spectrum of 5-(4-(dimethylamino)phenyl)-1,3-dimethyl-5,12-dihydrobenzo[g]pyrimido[4,5-*b*]quinoline-2,4,6,11(1*H*,3*H*)-tetraone (U12).

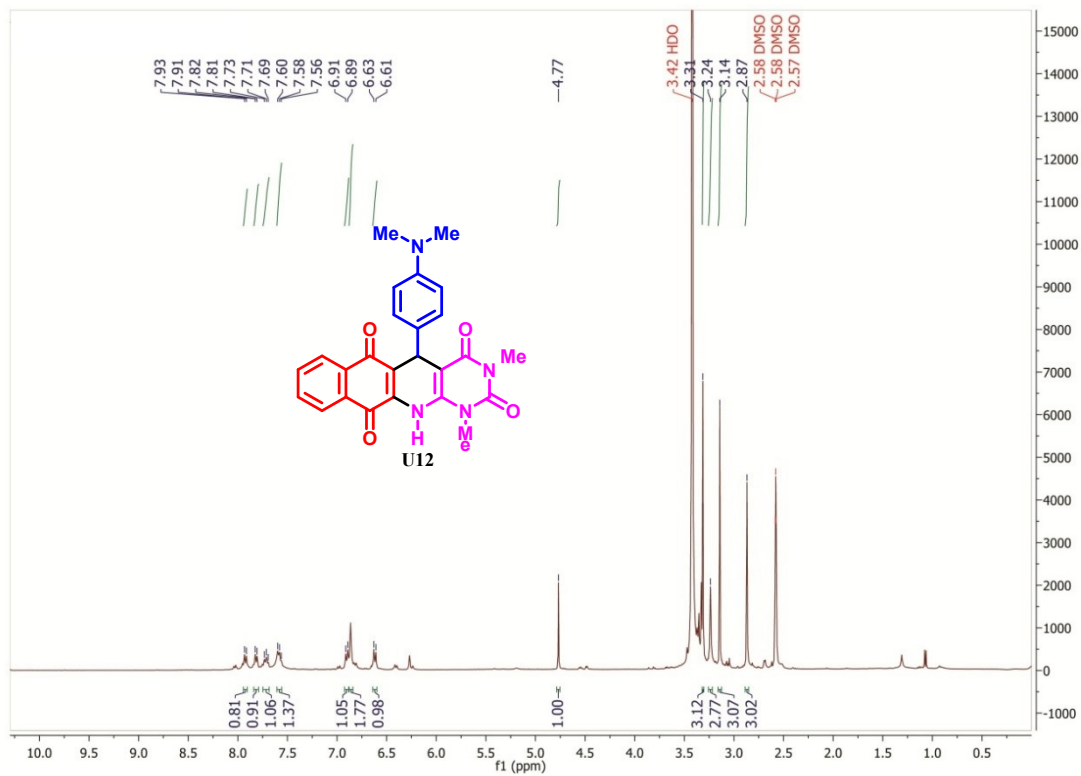

**<sup>1</sup>H NMR spectrum of 5-(4-(dimethylamino)phenyl)-1,3-dimethyl-5,12-dihydrobenzo[g]pyrimido[4,5-*b*]quinoline-2,4,6,11(1*H*,3*H*)-tetraone (U12).**

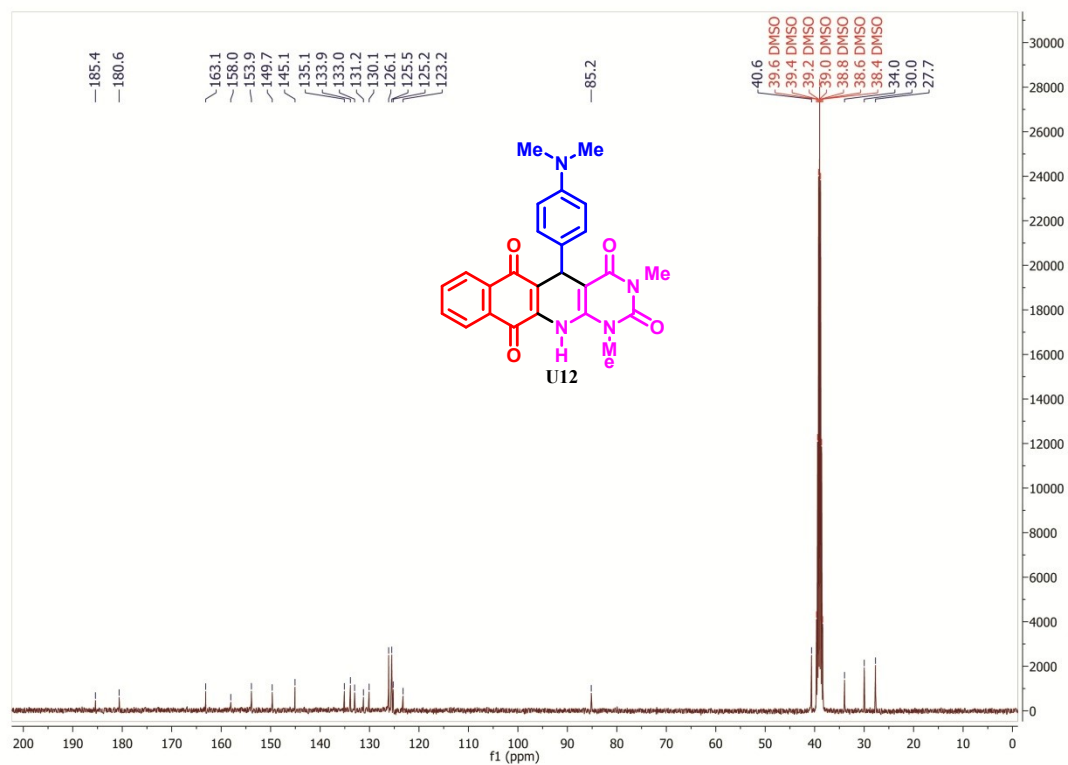

**<sup>1</sup>H NMR spectrum of 5-(4-(dimethylamino)phenyl)-1,3-dimethyl-5,12-dihydrobenzo[*g*]pyrimido[4,5-*b*]quinoline-2,4,6,11(1*H*,3*H*)-tetraone (U12).**

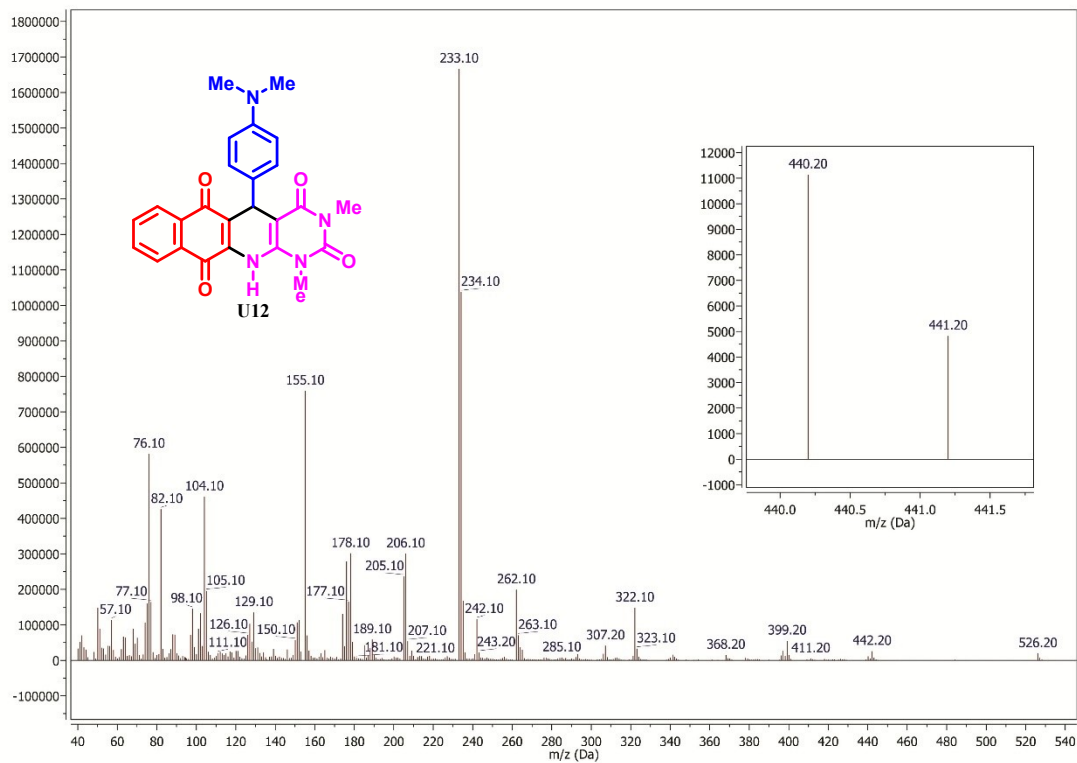

**Mass spectrum of 5-(4-(dimethylamino)phenyl)-1,3-dimethyl-5,12-dihydrobenzo[*g*]pyrimido[4,5-*b*]quinoline-2,4,6,11(1*H*,3*H*)-tetraone (U12).**

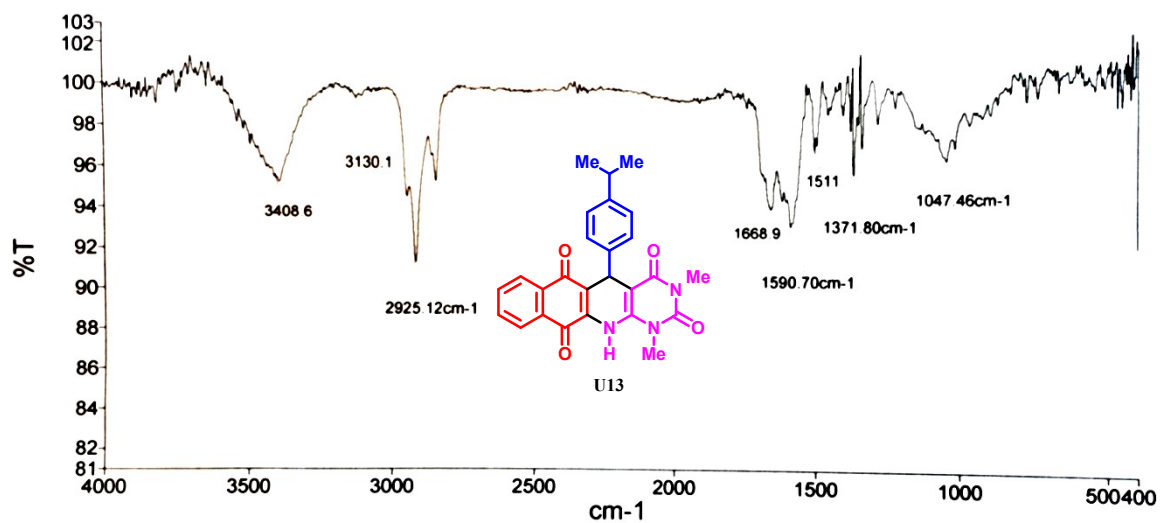

FT-IR spectrum of 5-(4-isopropylphenyl)-1,3-dimethyl-5,12-dihydrobenzo[*g*]pyrimido[4,5-*b*]quinoline-2,4,6,11(1*H*,3*H*)-tetraone (U13).



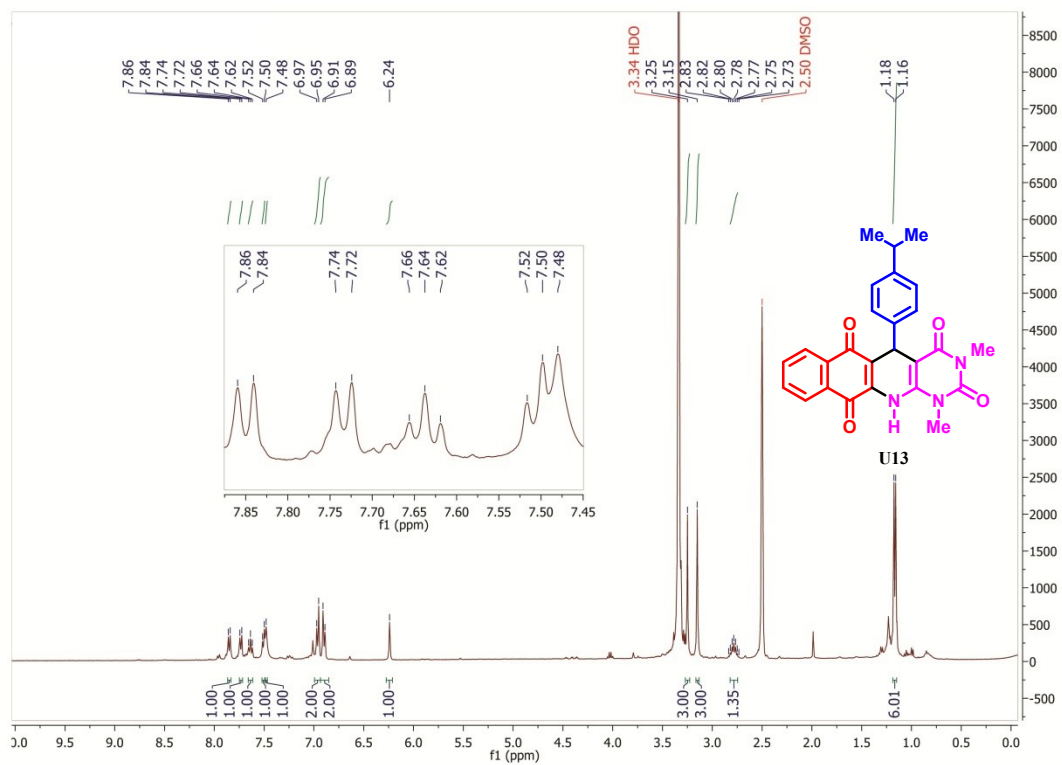

**<sup>1</sup>H NMR spectrum of 5-(4-isopropylphenyl)-1,3-dimethyl-5,12-dihydrobenzo[*g*]pyrimido[4,5-*b*]quinoline-2,4,6,11(1*H*,3*H*)-tetraone (U13).**

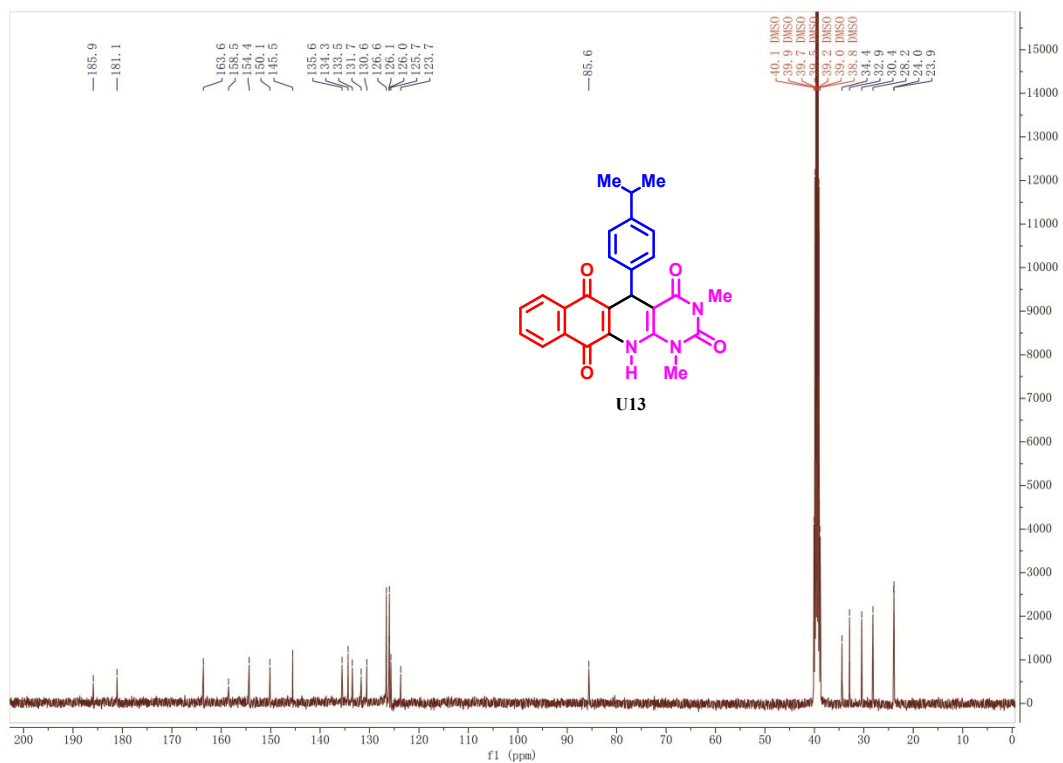

**<sup>13</sup>C NMR spectrum of 5-(4-isopropylphenyl)-1,3-dimethyl-5,12-dihydrobenzo[g]pyrimido[4,5-*b*]quinoline-2,4,6,11(1*H*,3*H*)-tetraone (U13).**

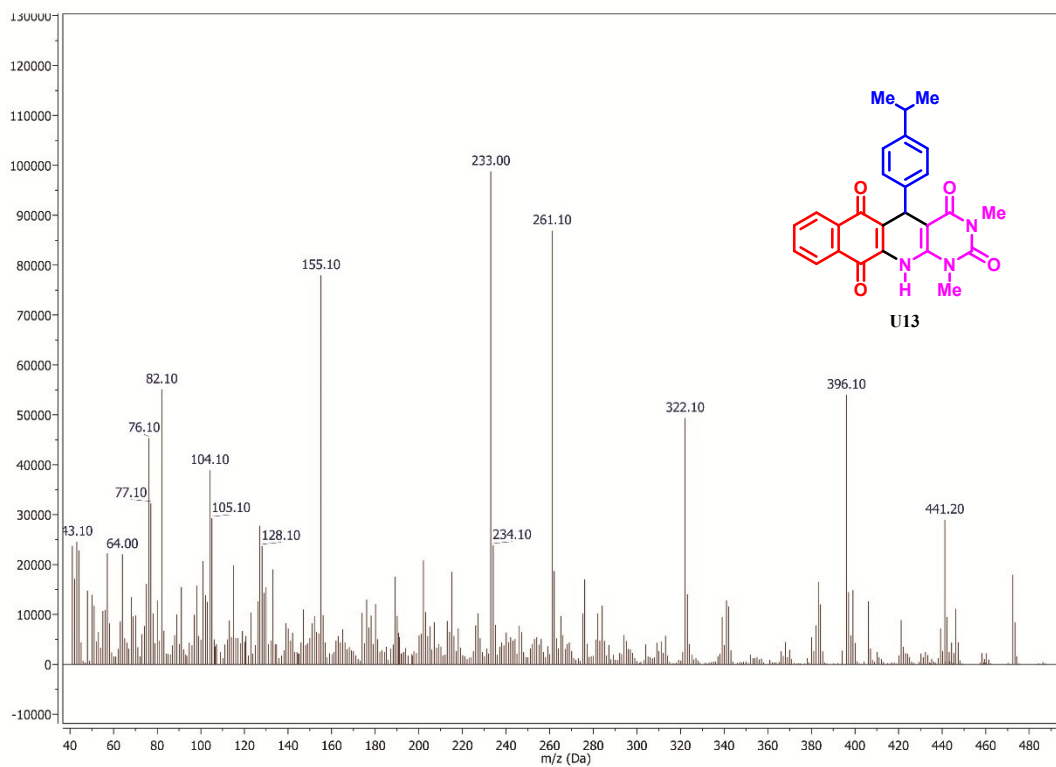

**Mass spectrum of 5-(4-isopropylphenyl)-1,3-dimethyl-5,12-dihydrobenzo[g]pyrimido[4,5-b]quinoline-2,4,6,11(1*H*,3*H*)-tetraone (U13).**

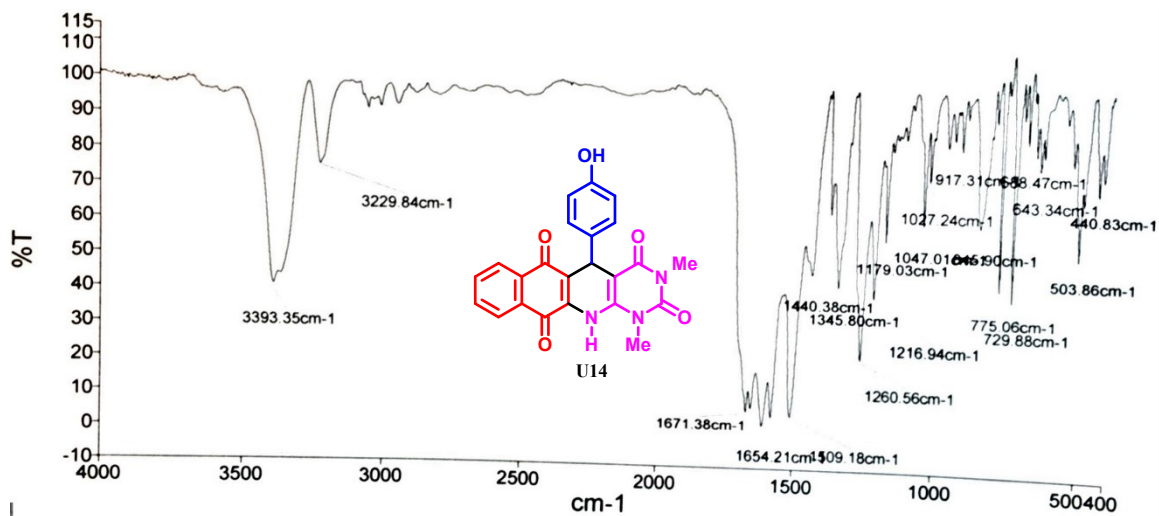

FT-IR spectrum of 5-(4-hydroxyphenyl)-1,3-dimethyl-5,12-dihydrobenzo[g]pyrimido[4,5-b]quinoline-2,4,6,11(1*H*,3*H*)-tetraone (U14).

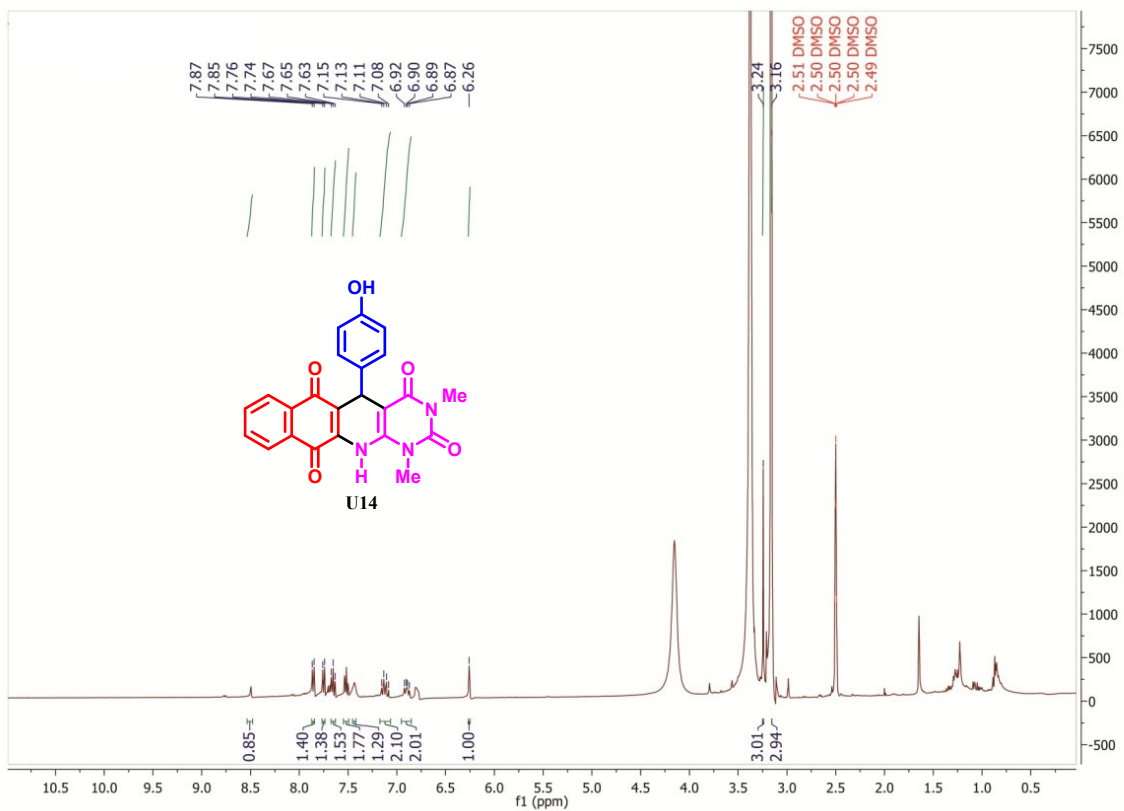

**<sup>1</sup>H NMR spectrum of 5-(4-hydroxyphenyl)-1,3-dimethyl-5,12-dihydrobenzo[g]pyrimido[4,5-b]quinoline-2,4,6,11(1*H*,3*H*)-tetraone (U14).**

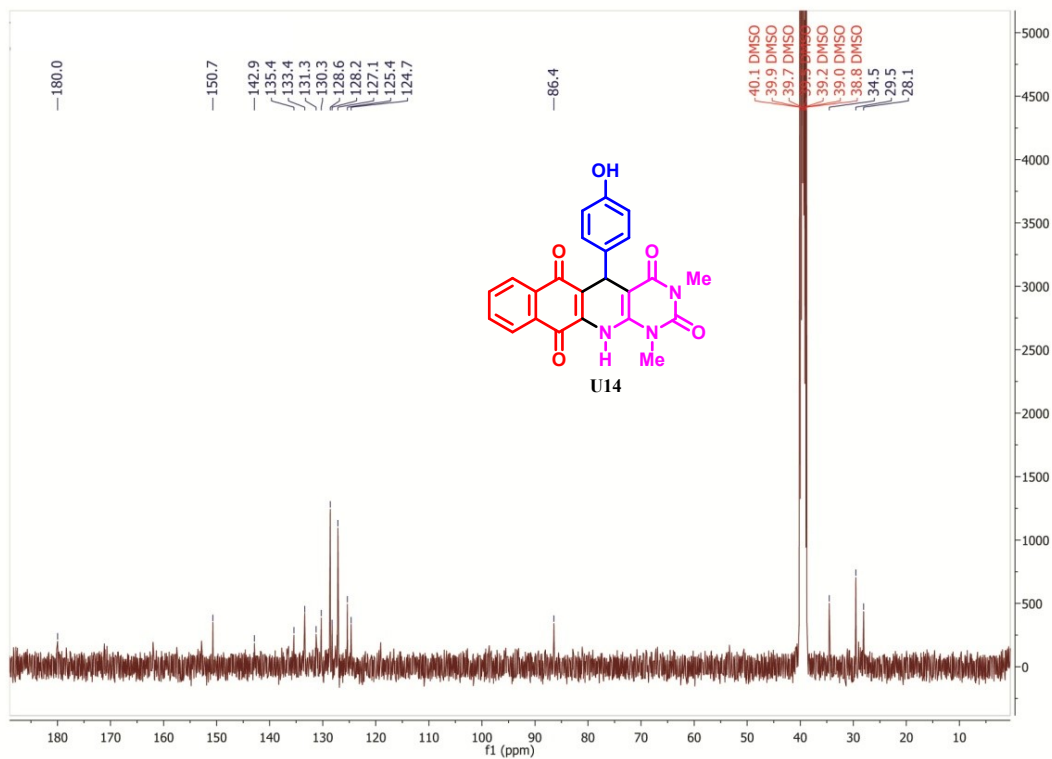

<sup>13</sup>C NMR spectrum of 5-(4-hydroxyphenyl)-1,3-dimethyl-5,12-dihydrobenzo[g]pyrimido[4,5-b]quinoline-2,4,6,11(1*H*,3*H*)-tetraone (U14).

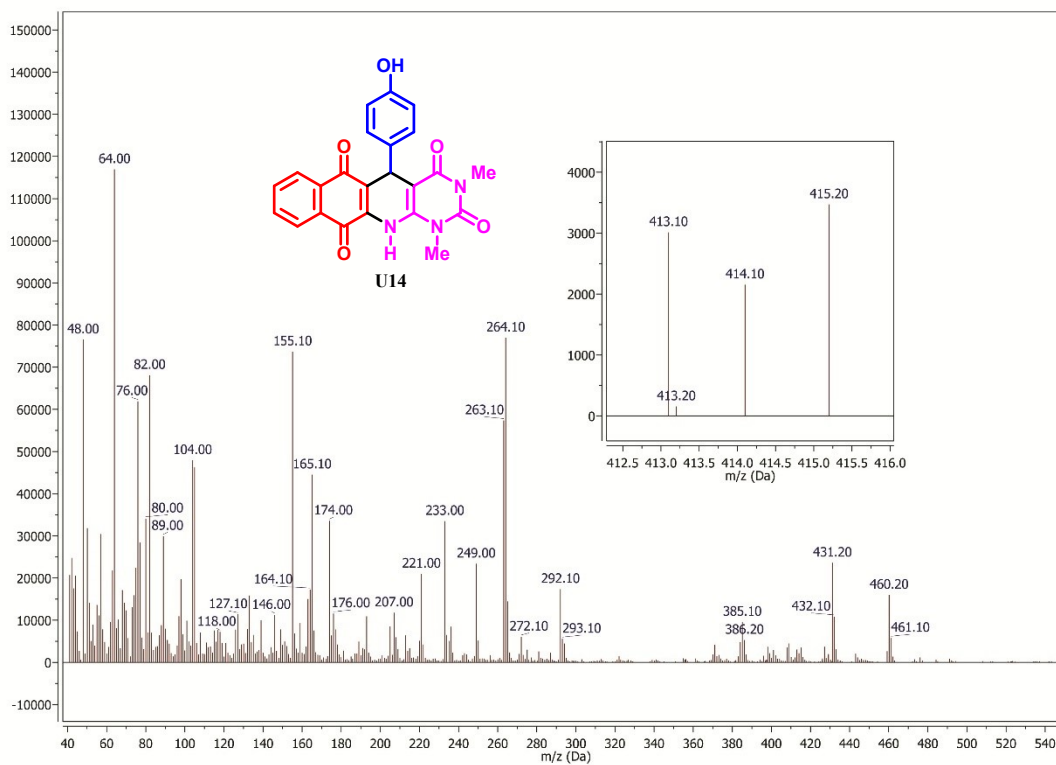

**Mass spectrum of 5-(4-hydroxyphenyl)-1,3-dimethyl-5,12-dihydrobenzo[g]pyrimido[4,5-b]quinoline-2,4,6,11(1*H*,3*H*)-tetraone (U14).**

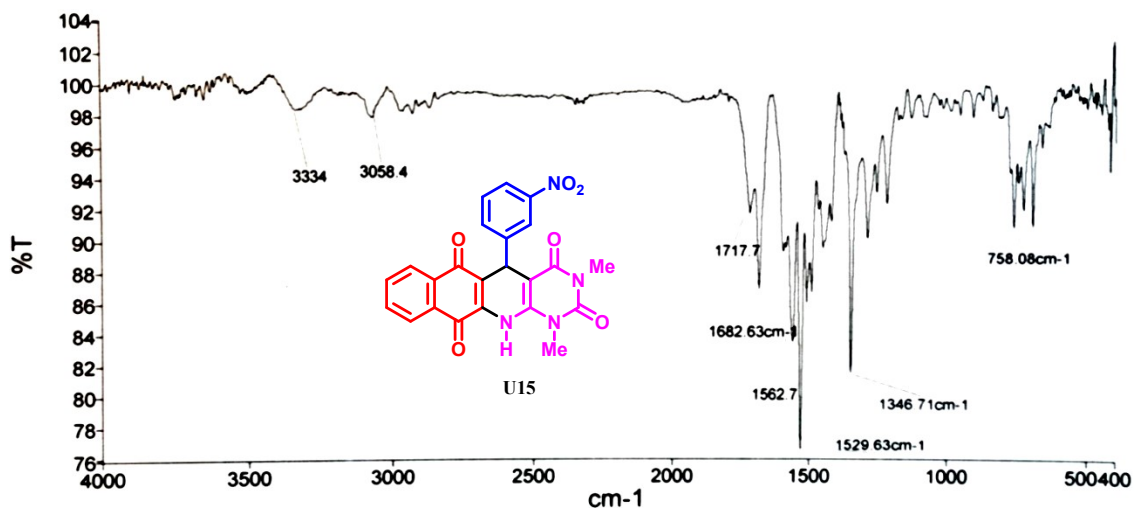

FT-IR spectrum of 1,3-dimethyl-5-(3-nitrophenyl)-5,12-dihydrobenzo[g]pyrimido[4,5-b]quinoline-2,4,6,11(1*H*,3*H*)-tetraone (U15).



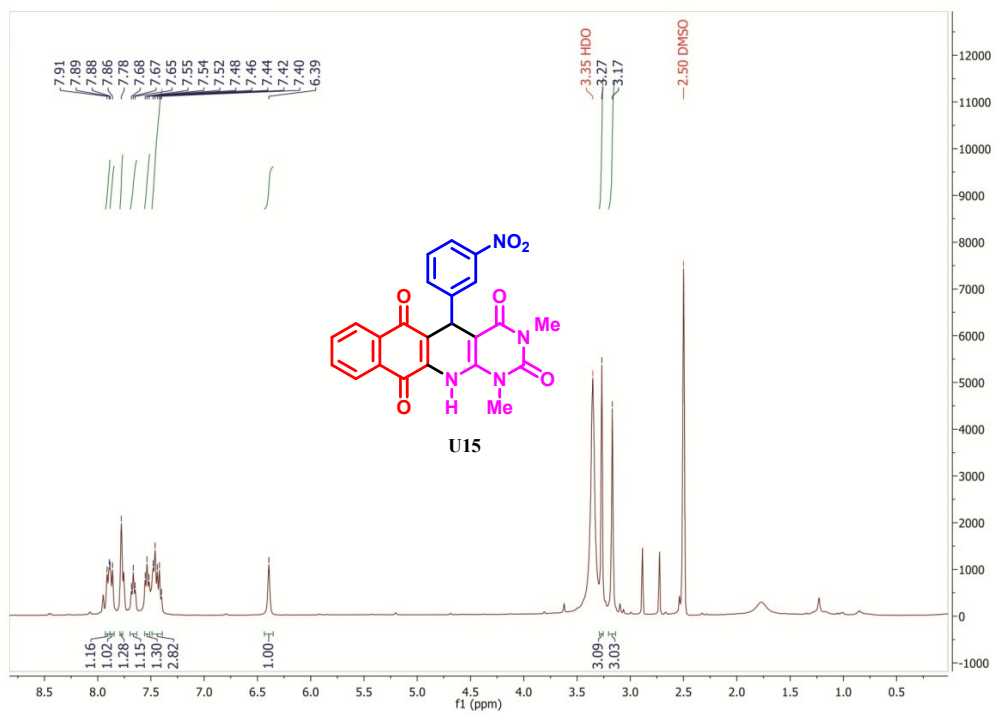

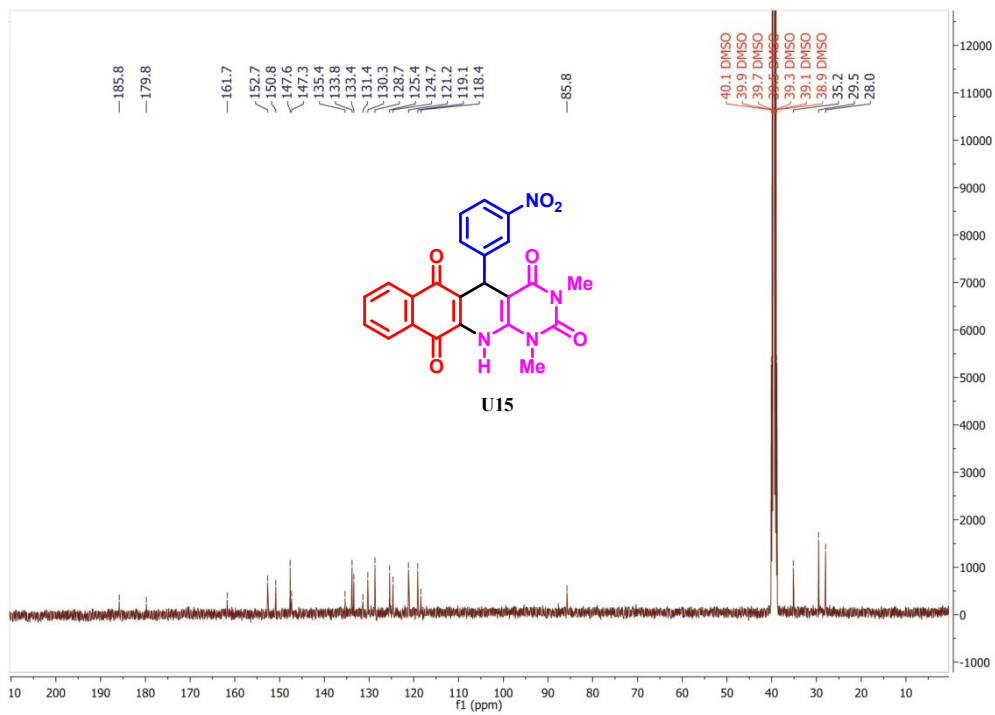

**<sup>13</sup>C NMR spectrum of 1,3-dimethyl-5-(3-nitrophenyl)-5,12-dihydrobenzo[*g*]pyrimido[4,5-*b*]quinoline-2,4,6,11(1*H*,3*H*)-tetraone (U15).**

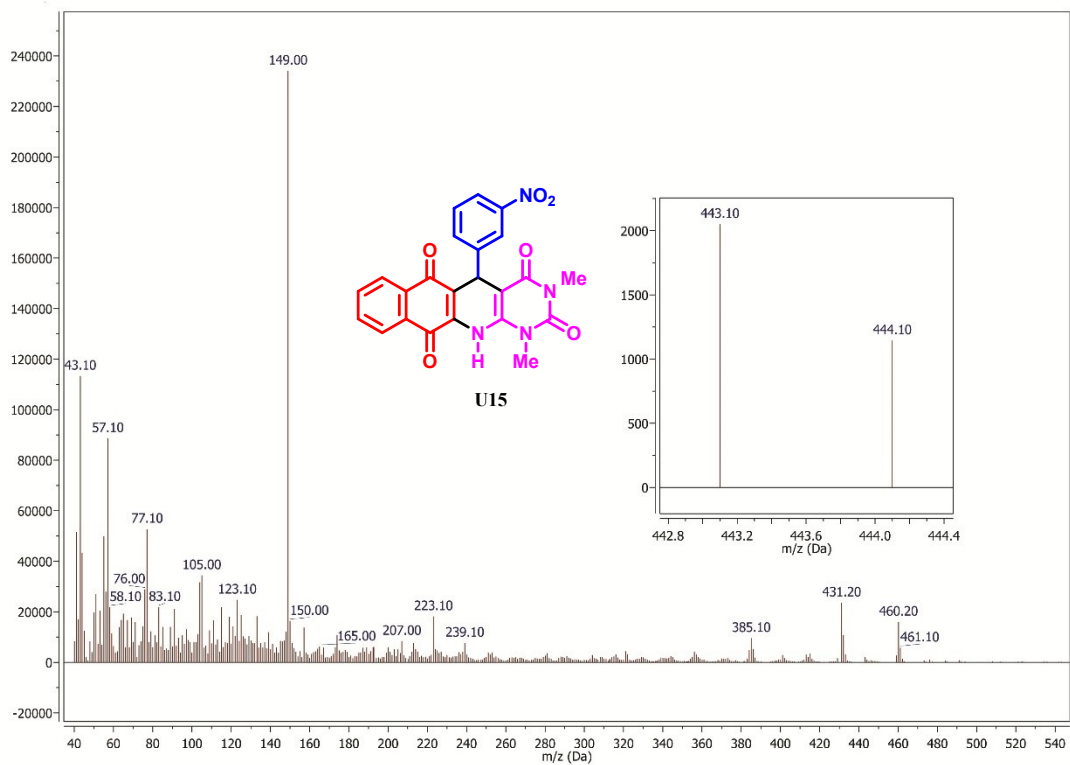

**Mass spectrum of 1,3-dimethyl-5-(3-nitrophenyl)-5,12-dihydrobenzo[g]pyrimido[4,5-b]quinoline-2,4,6,11(1*H*,3*H*)-tetraone (U15).**

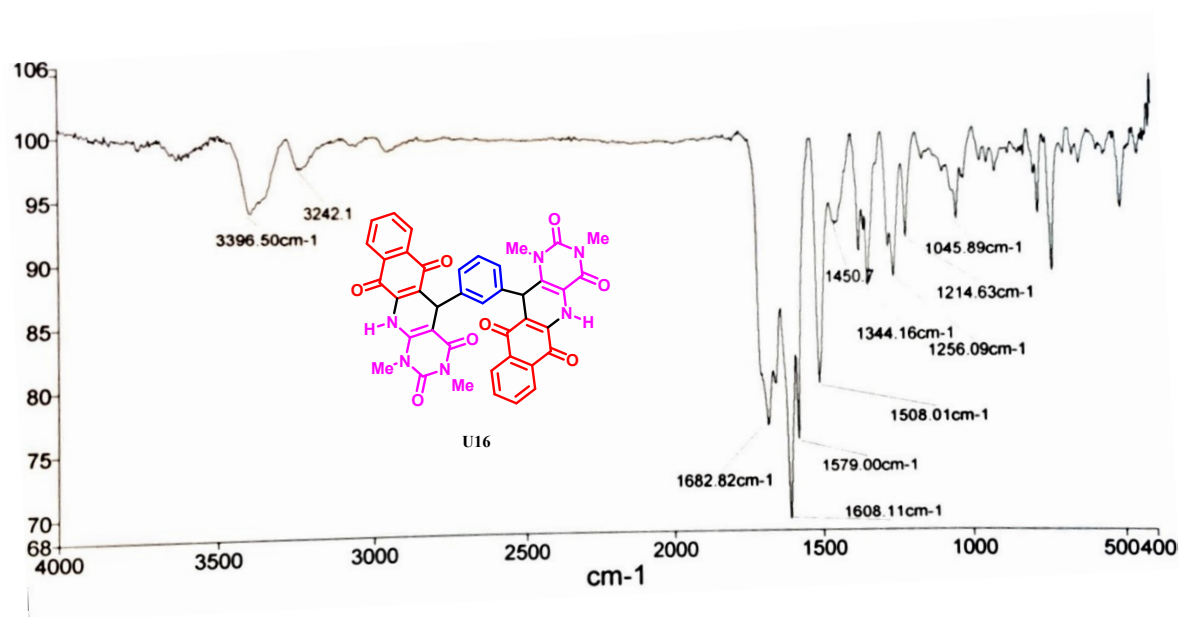

FT-IR spectrum of 5,5'-(1,3-phenylene)bis(1,3-dimethyl-5,12-dihydrobenzo[g]pyrimido[4,5-b]quinoline-2,4,6,11(1*H*,3*H*)-tetraone) (U16).

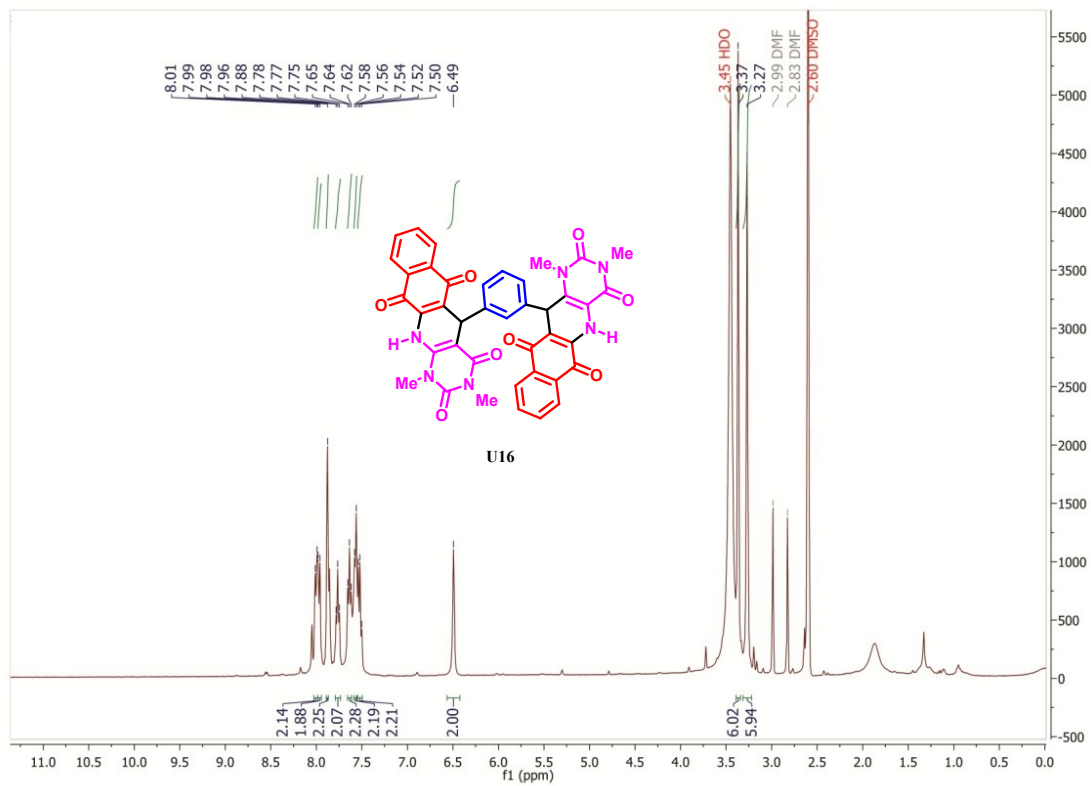

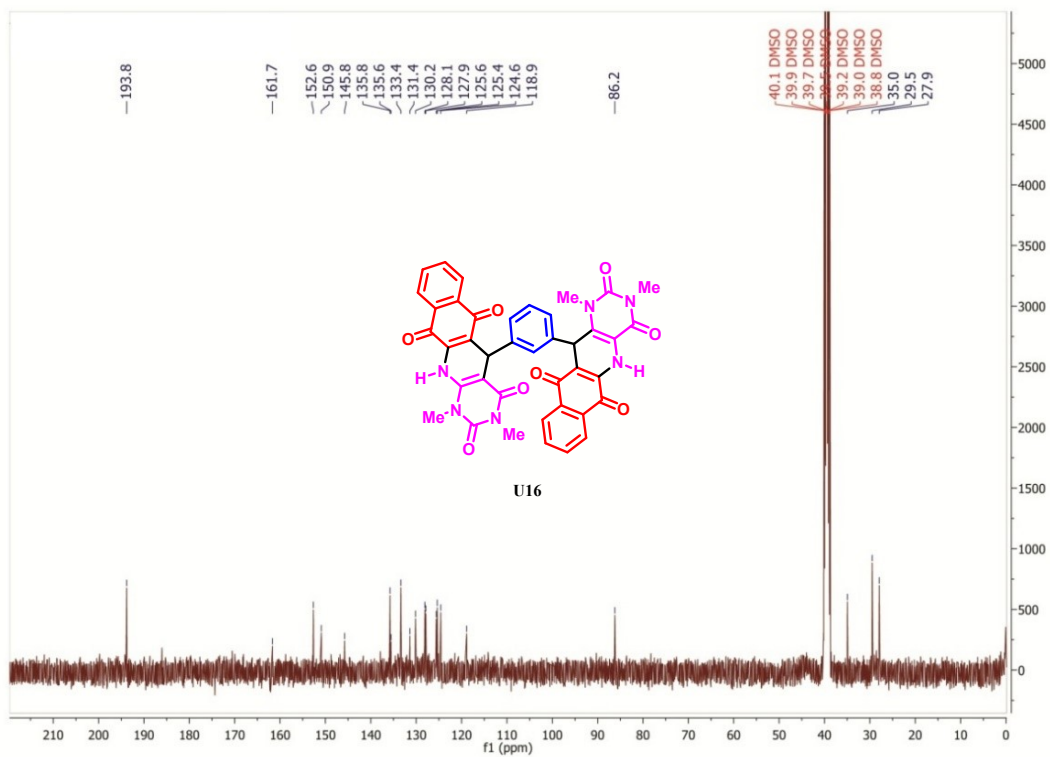

**<sup>13</sup>C NMR spectrum of 5,5'-(1,3-phenylene)bis(1,3-dimethyl-5,12-dihydrobenzo[g]pyrimido[4,5-b]quinoline-2,4,6,11(1H,3H)-tetraone) (U16).**

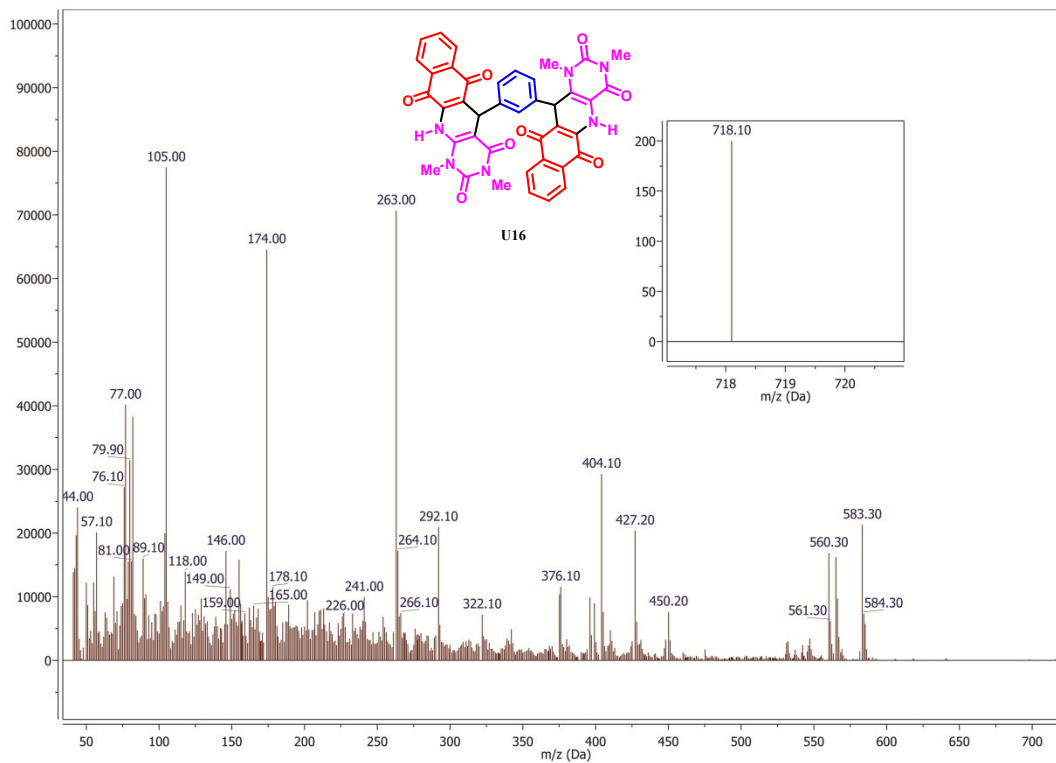

**Mass spectrum of 5,5'-(1,3-phenylene)bis(1,3-dimethyl-5,12-dihydrobenzo[*g*]pyrimido[4,5-*b*]quinoline-2,4,6,11(1*H*,3*H*)-tetraone) (U16).**

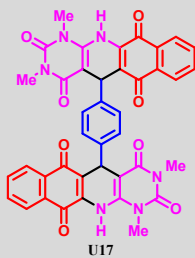

**FT-IR spectrum of 5,5'-(1,4-phenylene)bis(1,3-dimethyl-5,12-dihydrobenzo[g]pyrimido[4,5-b]quinoline-2,4,6,11(1H,3H)-tetraone) (U17).**



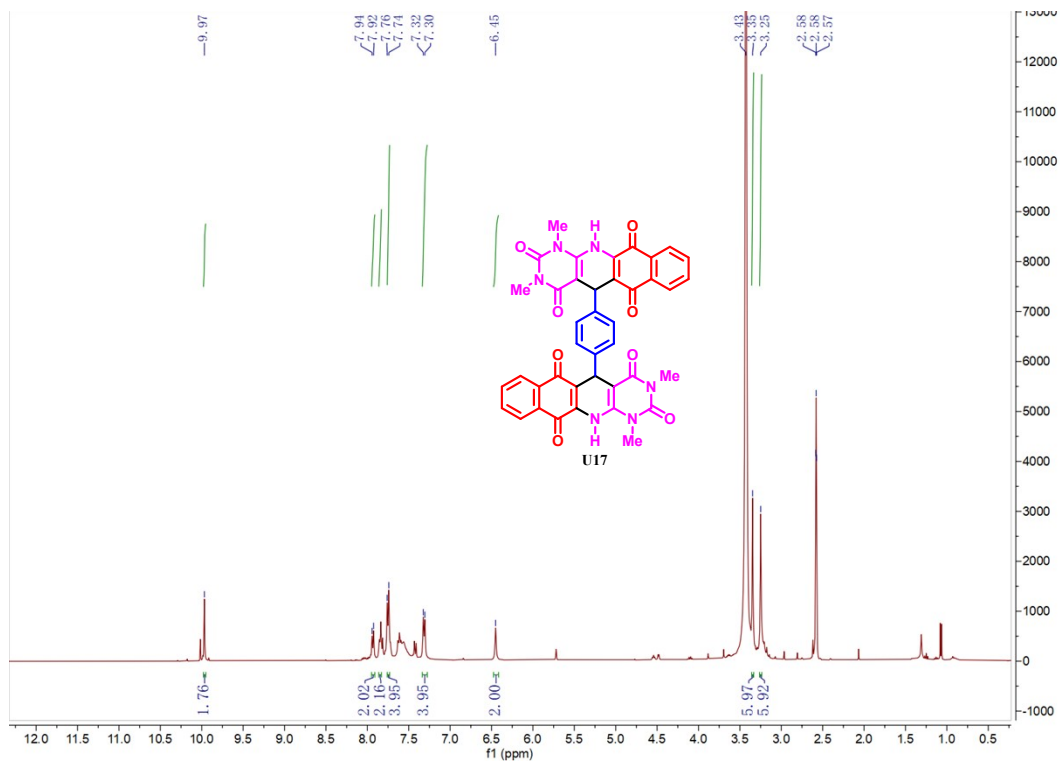

**<sup>1</sup>H NMR spectrum of 5,5'-(1,4-phenylene)bis(1,3-dimethyl-5,12-dihydrobenzo[g]pyrimido[4,5-b]quinoline-2,4,6,11(1*H*,3*H*)-tetraone) (U17).**

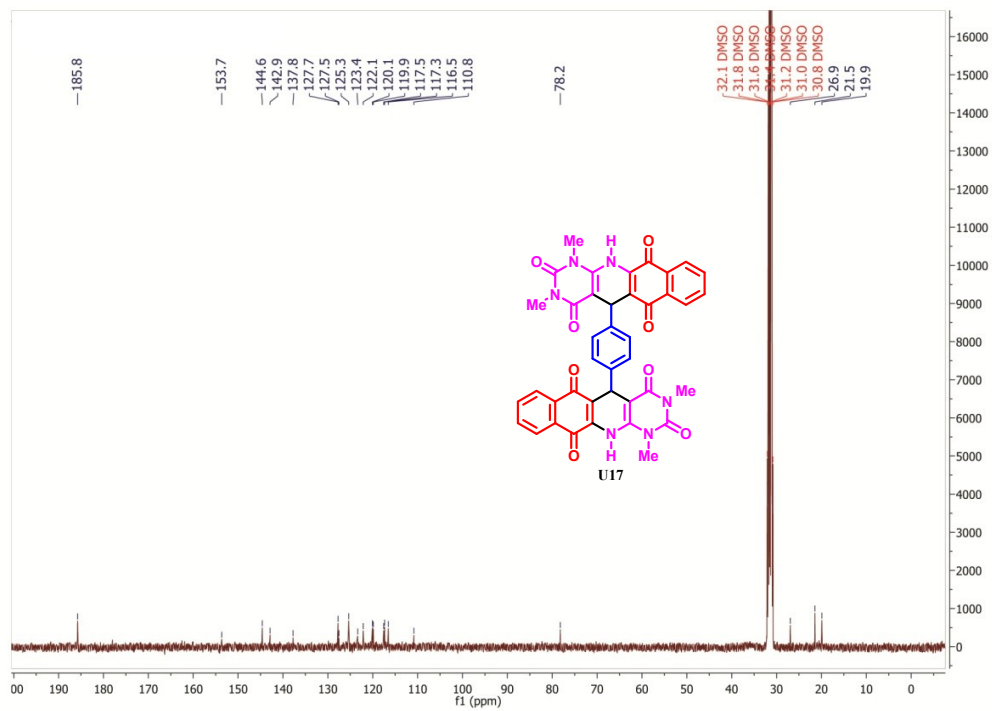

<sup>13</sup>C

**NMR spectrum of 5,5'-(1,4-phenylene)bis(1,3-dimethyl-5,12-dihydrobenzo[*g*]pyrimido[4,5-*b*]quinoline-2,4,6,11(1*H*,3*H*)-tetraone) (U17).**

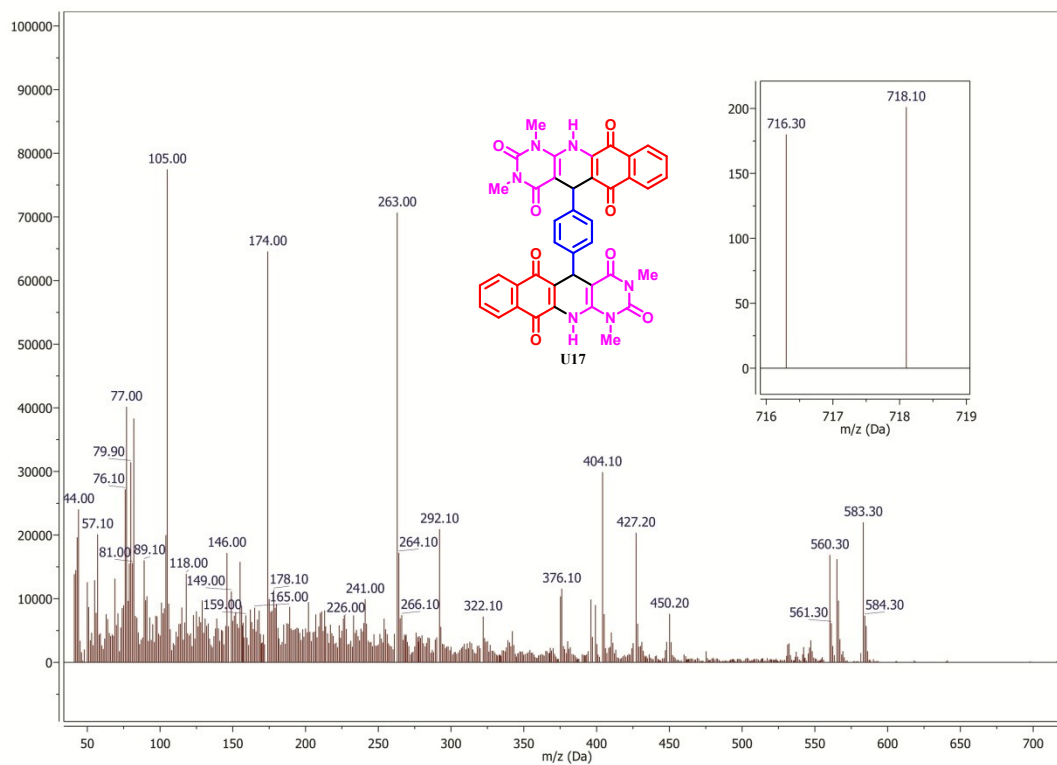

**Mass spectrum of 5,5'-(1,4-phenylene)bis(1,3-dimethyl-5,12-dihydrobenzo[g]pyrimido[4,5-b]quinoline-2,4,6,11(1*H*,3*H*)-tetraone) (U17).**
